# Supplementary material for: Heavy-Ion Fusion Reaction Calculations: Establishing the Theoretical Frameworks for 111In Radionuclide over the Coupled Channel Model
Source: MDPI journal article supplement (doi:10.3390/en14248594), 2021-12-20
Supplement: s1 [file s1]

# Heavy-Ion Fusion Reaction Calculations: Establishing the Theoretical Frameworks for $^{111}\text{In}$ Radionuclide Over the Coupled Channel Model

Zehra Merve Cinan <sup>1,\*</sup>, Burcu Erol <sup>2</sup>, Taylan Baskan <sup>1</sup> and Ahmet Hakan Yilmaz <sup>1</sup>

<sup>1</sup> Department of Physics, Faculty of Sciences, Karadeniz Technical University, Trabzon 61080, Turkey; taylanbaskan@ktu.edu.tr (T.B.); hakany@ktu.edu.tr (A.H.Y.)

<sup>2</sup> Department of Physics, Faculty of Arts and Sciences, Recep Tayyip Erdoğan University, Rize 53100, Turkey; burcu.karayunus@erdogan.edu.tr

\* Correspondence: m\_cinan@ktu.edu.tr; Tel.: +90-462-377-4136

## S1. Abbreviation and Symbols

All abbreviations and symbols in the “2. Coupled Channel (CC) Model” section in the main text are in the following table.

**Table S1.** Abbreviation and symbols of Coupled Channel (CC) Model Section in the main text.

| Abbreviton - Symbol | Information                        | References |
|---------------------|------------------------------------|------------|
| $D(B)$              | barrier distribution function      | [28,29]    |
| $B$                 | barrier height                     | [28,29]    |
| $R_B$               | barrier radius                     | [28,29]    |
| $\sigma_{fus}$      | fusion cross-sections              | [28,29]    |
| $E$                 | incident energy                    | [28,29]    |
| $T_l(B; E)$         | barrier penetration probability    | [28,29]    |
| $x$                 | function argument                  | [28,29]    |
| $\hbar$             | modified form of Planck’s constant | [28,29]    |
| $\mu$               | reduced mass of the system         | [28,29]    |
| $l$                 | angular momentum                   | [28,29]    |
| $P_{CN}(E, l)$      | penetration probability            | [28,29]    |
| $V_B$               | barrier potential                  | [28,29]    |
| CC                  | coupled channel model              | [28,29]    |
| CN                  | compound nucleus                   | [28,29]    |

## S2. Calculations Results

All calculations in the “3. Results of The Heavy-Ion Fusion Cross-Sections, Barrier Distributions and Potential Energies on Mutual Orientations in the Reactions Planes” section in the main text are in the following tables.

**Table S2.** Heavy-ion fusion cross-section calculations for  $^{37}\text{Cl} + ^{74}\text{Ge}$  (in the quadrupole vibrational state for the  $^{37}\text{Cl}$ :  $E^* = 1.7266$  MeV;  $\beta_{2+} = 0.1400$  and the quadrupole and hexadecapole rotational (deformed) state of the  $^{74}\text{Ge}$ :  $E^* = 0.5959$  MeV;  $\beta_2 = -0.2370$ ;  $\beta_4 = -0.0360$  framework) reaction.

| Exp.         |                            | Energy [MeV] | $\sigma_{\text{fus}}$ [mb] |                        |                          |                          |                          |
|--------------|----------------------------|--------------|----------------------------|------------------------|--------------------------|--------------------------|--------------------------|
|              |                            |              | No Excitations             | NRV                    | CCFULL                   | CCDEF                    | Wong's Formula           |
| Energy [MeV] | $\sigma_{\text{fus}}$ [mb] | 60           | $4.355 \times 10^{-5}$     | $5.086 \times 10^{-5}$ | $4.97483 \times 10^{-4}$ | $3.02597 \times 10^{-5}$ | $1.51883 \times 10^{-4}$ |
| 63.82        | 2.36                       | 60.5         | $1.316 \times 10^{-4}$     | $1.539 \times 10^{-4}$ | 0.00142                  | $7.21809 \times 10^{-5}$ |                          |
| 65.15        | 6.82                       | 61           | $3.919 \times 10^{-4}$     | $4.572 \times 10^{-4}$ | 0.0039                   | $1.72197 \times 10^{-4}$ | $9.03251 \times 10^{-4}$ |
| 66.49        | 18.2                       | 61.5         | 0.00114                    | 0.00132                | 0.01029                  | $4.10835 \times 10^{-4}$ |                          |
| 67.83        | 43.4                       | 62           | 0.00325                    | 0.00376                | 0.02663                  | $9.80259 \times 10^{-4}$ | 0.00537                  |
| 69.16        | 70.9                       | 62.5         | 0.00918                    | 0.01056                | 0.06816                  | 0.00234                  |                          |
| 70.5         | 108.7                      | 63           | 0.02536                    | 0.02899                | 0.17392                  | 0.00558                  | 0.03196                  |
| 71.83        | 163.4                      | 63.5         | 0.06895                    | 0.07822                | 0.44532                  | 0.01331                  |                          |
| 73.16        | 204                        | 64           | 0.186                      | 0.208                  | 1.13639                  | 0.03171                  | 0.18973                  |
| 74.5         | 265                        | 64.5         | 0.487                      | 0.537                  | 2.82161                  | 0.07536                  |                          |
| -            | -                          | 65           | 1.245                      | 1.345                  | 6.53592                  | 0.17802                  | 1.11333                  |
| -            | -                          | 65.5         | 3.099                      | 3.235                  | 13.35325                 | 0.41472                  |                          |
| -            | -                          | 66           | 7.242                      | 7.171                  | 23.40034                 | 0.93911                  | 6.11564                  |
| -            | -                          | 66.5         | 15.49                      | 14.18                  | 35.96809                 | 2.02287                  |                          |
| -            | -                          | 67           | 29.44                      | 24.65                  | 50.52573                 | 4.0583                   | 25.82643                 |
| -            | -                          | 67.5         | 48.66                      | 37.79                  | 67.03921                 | 7.50632                  |                          |
| -            | -                          | 68           | 71.47                      | 53.04                  | 85.58595                 | 12.83312                 | 66.83942                 |
| -            | -                          | 68.5         | 96.15                      | 70.44                  | 105.88535                | 20.45302                 |                          |
| -            | -                          | 69           | 121.4                      | 89.55                  | 127.36394                | 30.62599                 | 117.40567                |
| -            | -                          | 69.5         | 146.6                      | 109.8                  | 149.50704                | 43.31738                 |                          |
| -            | -                          | 70           | 171.6                      | 130.9                  | 172.02231                | 58.17984                 | 168.98932                |
| -            | -                          | 70.5         | 196.3                      | 152.2                  | 194.76502                | 74.72645                 |                          |
| -            | -                          | 71           | 220.6                      | 173.9                  | 217.66075                | 92.51441                 | 219.55017                |
| -            | -                          | 71.5         | 244.5                      | 195.9                  | 240.68765                | 111.21237                |                          |
| -            | -                          | 72           | 268                        | 218.1                  | 263.75135                | 130.58893                | 268.77757                |
| -            | -                          | 72.5         | 291.1                      | 240.3                  | 286.73777                | 150.48082                |                          |
| -            | -                          | 73           | 313.9                      | 262.5                  | 309.57814                | 170.76506                | 316.66789                |
| -            | -                          | 73.5         | 336.3                      | 284.4                  | 332.2354                 | 191.34066                |                          |
| -            | -                          | 74           | 358.3                      | 306.1                  | 354.65777                | 212.11766                | 363.26576                |
| -            | -                          | 74.5         | 379.9                      | 327.6                  | 376.83475                | 233.00947                |                          |
| -            | -                          | 75           | 401.2                      | 348.7                  | 398.73089                | 253.92865                | 408.62134                |
| -            | -                          | 75.5         | 422.2                      | 369.6                  | 420.33562                | 274.79051                |                          |
| -            | -                          | 76           | 442.9                      | 390                    | 441.64375                | 295.52343                | 452.7834                 |
| -            | -                          | 76.5         | 463.3                      | 410.2                  | 462.63452                | 316.07749                |                          |

|   |   |      |       |       |           |           |           |
|---|---|------|-------|-------|-----------|-----------|-----------|
| - | - | 77   | 483.2 | 430.1 | 483.33456 | 336.42503 | 495.79839 |
| - | - | 77.5 | 502.9 | 449.7 | 503.72702 | 356.55467 |           |
| - | - | 78   | 522.2 | 468.9 | 523.78376 | 376.46434 | 537.71045 |
| - | - | 78.5 | 541.3 | 487.8 | 543.56785 | 396.15631 |           |
| - | - | 79   | 560   | 506.4 | 563.03612 | 415.63414 | 578.56144 |
| - | - | 79.5 | 578.6 | 524.7 | 582.34789 | 434.90025 |           |
| - | - | 80   | 596.8 | 542.8 | 601.09264 | 453.95464 | 618.39115 |

**Table S3.** Heavy-ion fusion barrier-distributions calculations for  $^{37}\text{Cl} + ^{74}\text{Ge}$  (in the quadrupole vibrational state for the  $^{37}\text{Cl}$ :  $E^* = 1.7266$  MeV;  $\beta_{2+} = 0.1400$  and the quadrupole and hexadecapole rotational (deformed) state of the  $^{74}\text{Ge}$ :  $E^* = 0.5959$  MeV;  $\beta_2 = -0.2370$ ;  $\beta_4 = -0.0360$  framework) reaction.

| Exp.         |                                | Energy [MeV] | $d^2(E\sigma)/dE^2$ [mb / MeV] |         |                |
|--------------|--------------------------------|--------------|--------------------------------|---------|----------------|
| Energy [MeV] | $d^2(E\sigma)/dE^2$ [mb / MeV] |              | No Excitations                 | NRV     | Wong's Formula |
|              |                                | 60           | 0.00968                        | 0.01022 | 0.02951        |
| 63.82        | 100.4                          | 60.5         | 0.03083                        | 0.03346 |                |
| 65.15        | 265.5                          | 61           | 0.07695                        | 0.09752 | 0.1784         |
| 66.49        | 460                            | 61.5         | 0.228                          | 0.317   |                |
| 67.83        | 338.2                          | 62           | 0.995                          | 1.127   | 1.07834        |
| 69.16        | 349.4                          | 62.5         | 3.262                          | 2.981   |                |
| 70.5         | 459.6                          | 63           | 5.086                          | 4.774   | 6.50937        |
| 71.83        | 77.89                          | 63.5         | 2.293                          | 8.572   |                |
| 73.16        | 370.1                          | 64           | 19.16                          | 40.38   | 38.97758       |
| 74.5         | 1131                           | 64.5         | 132.2                          | 148.4   |                |
|              |                                | 65           | 398.4                          | 346.5   | 222.48217      |
|              |                                | 65.5         | 767                            | 579.1   |                |
|              |                                | 66           | 1108                           | 762.2   | 980.06719      |
|              |                                | 66.5         | 1298                           | 836.5   |                |
|              |                                | 67           | 1269                           | 803.5   | 1667.09284     |
|              |                                | 67.5         | 1041                           | 718.5   |                |
|              |                                | 68           | 714                            | 623.2   | 683.83759      |
|              |                                | 68.5         | 401.4                          | 517.9   |                |
|              |                                | 69           | 173.5                          | 403.4   | 138.11693      |
|              |                                | 69.5         | 41.62                          | 297.8   |                |
|              |                                | 70           | -17.99                         | 220.9   | 23.65875       |
|              |                                | 70.5         | -35.09                         | 178.7   |                |
|              |                                | 71           | -33.13                         | 155.3   | 3.936          |
|              |                                | 71.5         | -26.5                          | 129.5   |                |
|              |                                | 72           | -21.11                         | 97.11   | 0.65162        |
|              |                                | 72.5         | -17.95                         | 65.41   |                |
|              |                                | 73           | -17.11                         | 39.68   | 0.10779        |

|   |   |      |        |        |            |
|---|---|------|--------|--------|------------|
| - | - | 73.5 | -17.62 | 20.7   |            |
| - | - | 74   | -17.34 | 6.094  | 0.01783    |
| - | - | 74.5 | -15.84 | -6.135 |            |
| - | - | 75   | -14.99 | -14.58 | 0.00295    |
| - | - | 75.5 | -16.22 | -17.13 |            |
| - | - | 76   | -19.25 | -15.5  | 4.87701E-4 |
| - | - | 76.5 | -22.21 | -15.04 |            |
| - | - | 77   | -22.6  | -18.75 | 8.06627E-5 |
| - | - | 77.5 | -20.05 | -24.13 |            |
| - | - | 78   | -13.47 | -23.46 | 1.33411E-5 |
| - | - | 78.5 | 0.106  | -9.38  |            |
| - | - | 79   | -40.98 | -41.06 | 2.20653E-6 |
| - | - | 79.5 | -43.44 | -39.14 | -          |
| - | - | 80   | 19.13  | 19.34  | 3.64947E-7 |

**Table S4.** Heavy-ion fusion cross-section calculations for  $^{37}\text{Cl} + ^{74}\text{Ge}$  (in the quadrupole vibrational state for the  $^{37}\text{Cl}$ :  $E^* = 3.0861$  MeV;  $\beta_{2+} = 0.2400$  and the quadrupole and hexadecapole rotational (deformed) state of the  $^{74}\text{Ge}$ :  $E^* = 0.5959$  MeV;  $\beta_2 = -0.2370$ ;  $\beta_4 = -0.0360$  framework) reaction.

| Exp.         |                            | Energy [MeV] | $\sigma_{\text{fus}}$ [mb] |                        |                          |                          |                          |
|--------------|----------------------------|--------------|----------------------------|------------------------|--------------------------|--------------------------|--------------------------|
|              |                            |              | No Excitations             | NRV                    | CCFULL                   | CCDEF                    | Wong's Formula           |
| Energy [MeV] | $\sigma_{\text{fus}}$ [mb] | 60           | $4.355 \times 10^{-5}$     | $5.646 \times 10^{-5}$ | $7.71599 \times 10^{-4}$ | $2.18727 \times 10^{-4}$ | $7.67335 \times 10^{-5}$ |
| 63.82        | 2.36                       | 60.5         | $1.316 \times 10^{-4}$     | $1.703 \times 10^{-4}$ | 0.00202                  | $5.277 \times 10^{-4}$   |                          |
| 65.15        | 6.82                       | 61           | $3.919 \times 10^{-4}$     | $5.036 \times 10^{-4}$ | 0.00515                  | 0.00127                  | $4.58702 \times 10^{-4}$ |
| 66.49        | 18.2                       | 61.5         | 0.00114                    | 0.00145                | 0.01292                  | 0.00307                  |                          |
| 67.83        | 43.4                       | 62           | 0.00325                    | 0.00408                | 0.03249                  | 0.00741                  | 0.00274                  |
| 69.16        | 70.9                       | 62.5         | 0.00918                    | 0.0113                 | 0.08262                  | 0.01784                  |                          |
| 70.5         | 108.7                      | 63           | 0.02536                    | 0.03051                | 0.21335                  | 0.04287                  | 0.0164                   |
| 71.83        | 163.4                      | 63.5         | 0.06895                    | 0.08095                | 0.55871                  | 0.10232                  |                          |
| 73.16        | 204                        | 64           | 0.186                      | 0.212                  | 1.45152                  | 0.24057                  | 0.09799                  |
| 74.5         | 265                        | 64.5         | 0.487                      | 0.537                  | 3.58728                  | 0.54829                  |                          |
|              |                            | 65           | 1.245                      | 1.323                  | 7.99654                  | 1.18304                  | 0.58192                  |
|              |                            | 65.5         | 3.099                      | 3.14                   | 15.46574                 | 2.36266                  |                          |
|              |                            | 66           | 7.242                      | 6.913                  | 26.01031                 | 4.32398                  | 3.33097                  |
|              |                            | 66.5         | 15.49                      | 13.75                  | 39.10007                 | 7.28475                  |                          |
|              |                            | 67           | 29.44                      | 24.19                  | 54.12261                 | 11.43699                 | 16.03226                 |
|              |                            | 67.5         | 48.66                      | 37.52                  | 70.73217                 | 16.96202                 |                          |
|              |                            | 68           | 71.47                      | 52.92                  | 88.932                   | 24.04836                 | 49.7067                  |
|              |                            | 68.5         | 96.15                      | 70.15                  | 108.79369                | 32.89584                 |                          |
|              |                            | 69           | 121.4                      | 88.84                  | 130.06112                | 43.68048                 | 97.58319                 |
|              |                            | 69.5         | 146.6                      | 108.7                  | 152.15681                | 56.46127                 |                          |
|              |                            | 70           | 171.6                      | 129.4                  | 174.56687                | 71.08938                 | 148.33811                |
|              |                            | 70.5         | 196.3                      | 150.5                  | 197.09271                | 87.24189                 |                          |

|  |  |      |       |       |           |           |           |
|--|--|------|-------|-------|-----------|-----------|-----------|
|  |  | 71   | 220.6 | 171.8 | 219.78979 | 104.55739 | 198.44321 |
|  |  | 71.5 | 244.5 | 193.4 | 242.73676 | 122.73295 |           |
|  |  | 72   | 268   | 215.4 | 265.83068 | 141.54326 | 247.28587 |
|  |  | 72.5 | 291.1 | 237.5 | 288.85737 | 160.82506 |           |
|  |  | 73   | 313.9 | 259.6 | 311.68165 | 180.45849 | 294.81145 |
|  |  | 73.5 | 336.3 | 281.4 | 334.23172 | 200.35338 |           |
|  |  | 74   | 358.3 | 302.9 | 356.47896 | 220.44005 | 341.05598 |
|  |  | 74.5 | 379.9 | 324.2 | 378.4483  | 240.66178 |           |
|  |  | 75   | 401.2 | 345.2 | 400.12367 | 260.96616 | 386.06787 |
|  |  | 75.5 | 422.2 | 366   | 421.54895 | 281.29665 |           |
|  |  | 76   | 442.9 | 386.4 | 442.64252 | 301.592   | 429.89533 |
|  |  | 76.5 | 463.3 | 406.5 | 463.52377 | 321.79632 |           |
|  |  | 77   | 483.2 | 426.3 | 484.00143 | 341.86888 | 472.58443 |
|  |  | 77.5 | 502.9 | 445.8 | 504.23911 | 361.78553 |           |
|  |  | 78   | 522.2 | 465   | 524.11047 | 381.53455 | 514.17894 |
|  |  | 78.5 | 541.3 | 483.9 | 543.84573 | 401.11207 |           |
|  |  | 79   | 560   | 502.4 | 563.02094 | 420.51873 | 554.72042 |
|  |  | 79.5 | 578.6 | 520.6 | 582.41846 | 439.75683 |           |
|  |  | 80   | 596.8 | 538.6 | 600.92161 | 458.8269  | 594.24837 |

**Table S5.** Heavy-ion fusion barrier-distributions calculations for  $^{37}\text{Cl} + ^{74}\text{Ge}$  (in the quadrupole vibrational state for the  $^{37}\text{Cl}$ :  $E^* = 3.0861$  MeV;  $\beta_{2+} = 0.2400$  and the quadrupole and hexadecapole rotational (deformed) state of the  $^{74}\text{Ge}$ :  $E^* = 0.5959$  MeV;  $\beta_2 = -0.2370$ ;  $\beta_4 = -0.0360$  framework) reaction.

| Exp.         |                                | Energy [MeV] | $d^2(E\sigma)/dE^2$ [mb / MeV] |         |                |
|--------------|--------------------------------|--------------|--------------------------------|---------|----------------|
|              |                                |              | No Excitations                 | NRV     | Wong's Formula |
| Energy [MeV] | $d^2(E\sigma)/dE^2$ [mb / MeV] | 60           | 0.00968                        | 0.01122 | 0.01499        |
| 63.82        | 100.4                          | 60.5         | 0.03083                        | 0.03759 |                |
| 65.15        | 265.5                          | 61           | 0.07695                        | 0.11    | 0.09112        |
| 66.49        | 460                            | 61.5         | 0.228                          | 0.339   |                |
| 67.83        | 338.2                          | 62           | 0.995                          | 1.157   | 0.55371        |
| 69.16        | 349.4                          | 62.5         | 3.262                          | 3.114   |                |
| 70.5         | 459.6                          | 63           | 5.086                          | 5.309   | 3.36234        |
| 71.83        | 77.89                          | 63.5         | 2.293                          | 9.002   |                |
| 73.16        | 370.1                          | 64           | 19.16                          | 37.51   | 20.33106       |
| 74.5         | 1131                           | 64.5         | 132.2                          | 139     |                |
|              |                                | 65           | 398.4                          | 333.9   | 119.83418      |
|              |                                | 65.5         | 767                            | 573.5   |                |
|              |                                | 66           | 1108                           | 771.1   | 610.30857      |
|              |                                | 66.5         | 1298                           | 856.3   |                |
|              |                                | 67           | 1269                           | 816.7   | 1618.10792     |

|  |  |      |        |        |                          |
|--|--|------|--------|--------|--------------------------|
|  |  | 67.5 | 1041   | 705.6  |                          |
|  |  | 68   | 714    | 585    | 1047.92601               |
|  |  | 68.5 | 401.4  | 478.1  |                          |
|  |  | 69   | 173.5  | 382    | 245.47507                |
|  |  | 69.5 | 41.62  | 293.6  |                          |
|  |  | 70   | -17.99 | 222.3  | 43.08599                 |
|  |  | 70.5 | -35.09 | 181.4  |                          |
|  |  | 71   | -33.13 | 164.4  | 7.16661                  |
|  |  | 71.5 | -26.5  | 147.7  |                          |
|  |  | 72   | -21.11 | 116.8  | 1.18131                  |
|  |  | 72.5 | -17.95 | 76.02  |                          |
|  |  | 73   | -17.11 | 38.42  | 0.19443                  |
|  |  | 73.5 | -17.62 | 14.04  |                          |
|  |  | 74   | -17.34 | 3.277  | 0.03199                  |
|  |  | 74.5 | -15.84 | -1.192 |                          |
|  |  | 75   | -14.99 | -5.379 | 0.00526                  |
|  |  | 75.5 | -16.22 | -9.19  |                          |
|  |  | 76   | -19.25 | -11.61 | $8.66182 \times 10^{-4}$ |
|  |  | 76.5 | -22.21 | -14.09 |                          |
|  |  | 77   | -22.6  | -18.09 | $1.42522 \times 10^{-4}$ |
|  |  | 77.5 | -20.05 | -23.35 |                          |
|  |  | 78   | -13.47 | -23.68 | $2.34507 \times 10^{-5}$ |
|  |  | 78.5 | 0.106  | -9.895 |                          |
|  |  | 79   | -40.98 | -49.49 | $3.85859 \times 10^{-6}$ |
|  |  | 79.5 | -43.44 | -47.07 |                          |
|  |  | 80   | 19.13  | 22.97  | $6.34895 \times 10^{-7}$ |

**Table S6.** Heavy-ion fusion cross-section calculations for  $^{37}\text{Cl} + ^{74}\text{Ge}$  (in the octupole vibrational state for the  $^{37}\text{Cl}$ :  $E^* = 3.1035$  MeV;  $\beta_{3-} = 0.3200$  and the quadrupole and hexadecapole rotational (deformed) state of the  $^{74}\text{Ge}$ :  $E^* = 0.5959$  MeV;  $\beta_2 = -0.2370$ ;  $\beta_4 = -0.0360$  framework) reaction.

| Exp.         |                            | Energy [MeV] | $\sigma_{\text{fus}}$ [mb] |                        |         |         |                          |
|--------------|----------------------------|--------------|----------------------------|------------------------|---------|---------|--------------------------|
|              |                            |              | No Excitations             | NRV                    | CCFULL  | CCDEF   | Wong's Formula           |
| Energy [MeV] | $\sigma_{\text{fus}}$ [mb] | 60           | $4.355 \times 10^{-5}$     | $5.025 \times 10^{-5}$ | 0.00187 | 0.00133 | $4.72276 \times 10^{-5}$ |
| 63.82        | 2.36                       | 60.5         | $1.316 \times 10^{-4}$     | $1.558 \times 10^{-4}$ | 0.00536 | 0.00325 |                          |
| 65.15        | 6.82                       | 61           | $3.919 \times 10^{-4}$     | $4.723 \times 10^{-4}$ | 0.01565 | 0.0079  | $2.79424 \times 10^{-4}$ |
| 66.49        | 18.2                       | 61.5         | 0.00114                    | 0.00139                | 0.04546 | 0.01919 |                          |
| 67.83        | 43.4                       | 62           | 0.00325                    | 0.004                  | 0.1273  | 0.04642 | 0.00165                  |
| 69.16        | 70.9                       | 62.5         | 0.00918                    | 0.01136                | 0.33141 | 0.11121 |                          |
| 70.5         | 108.7                      | 63           | 0.02536                    | 0.03136                | 0.79066 | 0.26078 | 0.00979                  |
| 71.83        | 163.4                      | 63.5         | 0.06895                    | 0.08495                | 1.752   | 0.58637 |                          |
| 73.16        | 204                        | 64           | 0.186                      | 0.226                  | 3.66803 | 1.23196 | 0.05791                  |
| 74.5         | 265                        | 64.5         | 0.487                      | 0.58                   | 7.31992 | 2.37314 |                          |

|  |  |      |       |       |           |           |           |
|--|--|------|-------|-------|-----------|-----------|-----------|
|  |  | 65   | 1.245 | 1.442 | 13.82516  | 4.17782   | 0.34145   |
|  |  | 65.5 | 3.099 | 3.437 | 24.03242  | 6.78367   |           |
|  |  | 66   | 7.242 | 7.551 | 37.59431  | 10.29971  | 1.97      |
|  |  | 66.5 | 15.49 | 14.85 | 53.36735  | 14.81809  |           |
|  |  | 67   | 29.44 | 25.73 | 70.71251  | 20.42671  | 10.16225  |
|  |  | 67.5 | 48.66 | 39.31 | 89.58744  | 27.22068  |           |
|  |  | 68   | 71.47 | 54.84 | 109.6929  | 35.31232  | 36.63706  |
|  |  | 68.5 | 96.15 | 72.16 | 130.50717 | 44.83534  |           |
|  |  | 69   | 121.4 | 90.96 | 151.80708 | 55.92833  | 81.01482  |
|  |  | 69.5 | 146.6 | 110.9 | 173.50945 | 68.67542  |           |
|  |  | 70   | 171.6 | 131.7 | 195.62523 | 83.01926  | 130.81939 |
|  |  | 70.5 | 196.3 | 152.8 | 218.17411 | 98.73794  |           |
|  |  | 71   | 220.6 | 174.1 | 241.22511 | 115.5315  | 180.56866 |
|  |  | 71.5 | 244.5 | 195.8 | 264.54902 | 133.12321 |           |
|  |  | 72   | 268   | 217.9 | 287.89874 | 151.29998 | 229.16565 |
|  |  | 72.5 | 291.1 | 240   | 311.06408 | 169.90834 |           |
|  |  | 73   | 313.9 | 262.1 | 333.72995 | 188.83862 | 276.46912 |
|  |  | 73.5 | 336.3 | 283.9 | 356.30293 | 208.01159 |           |
|  |  | 74   | 358.3 | 305.5 | 378.07689 | 227.36991 | 322.50034 |
|  |  | 74.5 | 379.9 | 326.8 | 400.12088 | 246.87248 |           |
|  |  | 75   | 401.2 | 347.8 | 421.24138 | 266.48852 | 367.30509 |
|  |  | 75.5 | 422.2 | 368.5 | 442.70704 | 286.18857 |           |
|  |  | 76   | 442.9 | 388.9 | 463.36319 | 305.93426 | 410.93093 |
|  |  | 76.5 | 463.3 | 408.9 | 483.90758 | 325.67623 |           |
|  |  | 77   | 483.2 | 428.7 | 504.10115 | 345.36466 | 453.42366 |
|  |  | 77.5 | 502.9 | 448.2 | 523.79319 | 364.96106 |           |
|  |  | 78   | 522.2 | 467.6 | 543.54083 | 384.44119 | 494.82683 |
|  |  | 78.5 | 541.3 | 486.3 | 562.00555 | 403.79226 |           |
|  |  | 79   | 560   | 505.2 | 580.35091 | 423.00922 | 535.18183 |
|  |  | 79.5 | 578.6 | 523   | 604.5039  | 442.09182 |           |
|  |  | 80   | 596.8 | 541.2 | 614.20488 | 461.04142 | 574.52795 |

**Table S7.** Heavy-ion fusion barrier-distributions calculations for  $^{37}\text{Cl} + ^{74}\text{Ge}$  (in the octupole vibrational state for the  $^{37}\text{Cl}$ :  $E^* = 3.1035$  MeV;  $\beta_3 = 0.3200$  and the quadrupole and hexadecapole rotational (deformed) state of the  $^{74}\text{Ge}$ :  $E^* = 0.5959$  MeV;  $\beta_2 = -0.2370$ ;  $\beta_4 = -0.0360$  framework) reaction.

| Exp.         |                                | Energy [MeV] | $d^2(E\sigma)/dE^2$ [mb / MeV] |         |                |
|--------------|--------------------------------|--------------|--------------------------------|---------|----------------|
| Energy [MeV] | $d^2(E\sigma)/dE^2$ [mb / MeV] |              | No Excitations                 | NRV     | Wong's Formula |
|              |                                | 60           | 0.00968                        | 0.01055 | 0.00912        |
| 63.82        | 100.4                          | 60.5         | 0.03083                        | 0.03462 |                |
| 65.15        | 265.5                          | 61           | 0.07695                        | 0.103   | 0.05487        |
| 66.49        | 460                            | 61.5         | 0.228                          | 0.344   |                |

---

|       |       |      |        |        |                          |
|-------|-------|------|--------|--------|--------------------------|
| 67.83 | 338.2 | 62   | 0.995  | 1.231  | 0.33005                  |
| 69.16 | 349.4 | 62.5 | 3.262  | 3.216  |                          |
| 70.5  | 459.6 | 63   | 5.086  | 5.092  | 1.98433                  |
| 71.83 | 77.89 | 63.5 | 2.293  | 9.453  |                          |
| 73.16 | 370.1 | 64   | 19.16  | 44.21  | 11.90023                 |
| 74.5  | 1131  | 64.5 | 132.2  | 158.9  |                          |
|       |       | 65   | 398.4  | 365.3  | 70.30403                 |
|       |       | 65.5 | 767    | 604.3  |                          |
|       |       | 66   | 1108   | 787.7  | 380.71463                |
|       |       | 66.5 | 1298   | 851.7  |                          |
|       |       | 67   | 1269   | 795.3  | 1338.88094               |
|       |       | 67.5 | 1041   | 680.7  |                          |
|       |       | 68   | 714    | 567.5  | 1379.92264               |
|       |       | 68.5 | 401.4  | 468.5  |                          |
|       |       | 69   | 173.5  | 376.2  | 405.33248                |
|       |       | 69.5 | 41.62  | 289.2  |                          |
|       |       | 70   | -17.99 | 219.9  | 75.41459                 |
|       |       | 70.5 | -35.09 | 182.3  |                          |
|       |       | 71   | -33.13 | 167.7  | 12.78229                 |
|       |       | 71.5 | -26.5  | 149.9  |                          |
|       |       | 72   | -21.11 | 115.2  | 2.13189                  |
|       |       | 72.5 | -17.95 | 71.65  |                          |
|       |       | 73   | -17.11 | 34.26  | 0.35461                  |
|       |       | 73.5 | -17.62 | 11.65  |                          |
|       |       | 74   | -17.34 | 1.066  | 0.05896                  |
|       |       | 74.5 | -15.84 | -5.687 |                          |
|       |       | 75   | -14.99 | -11.98 | 0.0098                   |
|       |       | 75.5 | -16.22 | -14.67 |                          |
|       |       | 76   | -19.25 | -10.84 | 0.00163                  |
|       |       | 76.5 | -22.21 | -4.709 |                          |
|       |       | 77   | -22.6  | -3.467 | $2.70897 \times 10^{-4}$ |
|       |       | 77.5 | -20.05 | -12.63 |                          |
|       |       | 78   | -13.47 | -25.15 | $4.50355 \times 10^{-5}$ |
|       |       | 78.5 | 0.106  | -31.53 |                          |
|       |       | 79   | -40.98 | -42.39 | $7.48698 \times 10^{-6}$ |
|       |       | 79.5 | -43.44 | -24.04 |                          |
|       |       | 80   | 19.13  | 10.99  | $1.24468 \times 10^{-6}$ |

---

**Table S8.** Heavy-ion fusion cross-section calculations for  $^{37}\text{Cl} + ^{74}\text{Ge}$  (in the octupole vibrational state for the  $^{37}\text{Cl}$ :  $E^* = 4.0100$  MeV;  $\beta_{3-} = 0.3300$  and the quadrupole and hexadecapole rotational (deformed) state of the  $^{74}\text{Ge}$ :  $E^* = 0.5959$  MeV;  $\beta_2 = -0.2370$ ;  $\beta_4 = -0.0360$  framework) reaction.

| Exp.         |                            | Energy [MeV] | $\sigma_{\text{fus}}$ [mb] |                        |           |           |                          |
|--------------|----------------------------|--------------|----------------------------|------------------------|-----------|-----------|--------------------------|
|              |                            |              | No Excitations             | NRV                    | CCFULL    | CCDEF     | Wong's Formula           |
| Energy [MeV] | $\sigma_{\text{fus}}$ [mb] | 60           | $4.355 \times 10^{-5}$     | $4.071 \times 10^{-5}$ | 0.00151   | 0.00168   | $4.4379 \times 10^{-5}$  |
| 63.82        | 2.36                       | 60.5         | $1.316 \times 10^{-4}$     | $1.266 \times 10^{-4}$ | 0.00411   | 0.0041    |                          |
| 65.15        | 6.82                       | 61           | $3.919 \times 10^{-4}$     | $3.843 \times 10^{-4}$ | 0.0115    | 0.00999   | $2.59907 \times 10^{-4}$ |
| 66.49        | 18.2                       | 61.5         | 0.00114                    | 0.00113                | 0.03268   | 0.02428   |                          |
| 67.83        | 43.4                       | 62           | 0.00325                    | 0.00325                | 0.0928    | 0.05867   | 0.00152                  |
| 69.16        | 70.9                       | 62.5         | 0.00918                    | 0.0092                 | 0.2533    | 0.14004   |                          |
| 70.5         | 108.7                      | 63           | 0.02536                    | 0.02533                | 0.64027   | 0.32545   | 0.00892                  |
| 71.83        | 163.4                      | 63.5         | 0.06895                    | 0.06854                | 1.48201   | 0.71952   |                          |
| 73.16        | 204                        | 64           | 0.186                      | 0.183                  | 3.1658    | 1.47543   | 0.05225                  |
| 74.5         | 265                        | 64.5         | 0.487                      | 0.471                  | 6.32629   | 2.76542   |                          |
|              |                            | 65           | 1.245                      | 1.178                  | 11.9161   | 4.74417   | 0.30509                  |
|              |                            | 65.5         | 3.099                      | 2.835                  | 20.92301  | 7.53464   |                          |
|              |                            | 66           | 7.242                      | 6.341                  | 33.61148  | 11.23401  | 1.74782                  |
|              |                            | 66.5         | 15.49                      | 12.84                  | 49.27112  | 15.92553  |                          |
|              |                            | 67           | 29.44                      | 23.07                  | 67.0319   | 21.69001  | 9.06597                  |
|              |                            | 67.5         | 48.66                      | 36.43                  | 86.5941   | 28.6163   |                          |
|              |                            | 68           | 71.47                      | 52.05                  | 107.80222 | 36.81078  | 33.70446                 |
|              |                            | 68.5         | 96.15                      | 69.64                  | 129.99865 | 46.40149  |                          |
|              |                            | 69           | 121.4                      | 88.77                  | 152.46399 | 57.52313  | 76.94795                 |
|              |                            | 69.5         | 146.6                      | 109.1                  | 174.93474 | 70.2611   |                          |
|              |                            | 70           | 171.6                      | 130.2                  | 197.54111 | 84.56586  | 126.44074                |
|              |                            | 70.5         | 196.3                      | 151.5                  | 220.45305 | 100.22568 |                          |
|              |                            | 71           | 220.6                      | 173.1                  | 243.69474 | 116.94802 | 176.10458                |
|              |                            | 71.5         | 244.5                      | 194.9                  | 267.30208 | 134.46018 |                          |
|              |                            | 72           | 268                        | 217                    | 290.85592 | 152.55135 | 224.66008                |
|              |                            | 72.5         | 291.1                      | 239.3                  | 314.41763 | 171.06965 |                          |
|              |                            | 73           | 313.9                      | 261.5                  | 337.58309 | 189.90675 | 271.93056                |
|              |                            | 73.5         | 336.3                      | 283.6                  | 360.3622  | 208.9847  |                          |
|              |                            | 74           | 358.3                      | 305.4                  | 382.95363 | 228.24756 | 317.93098                |
|              |                            | 74.5         | 379.9                      | 326.9                  | 404.74169 | 247.65573 |                          |
|              |                            | 75           | 401.2                      | 348                    | 426.78941 | 267.1801  | 362.70596                |
|              |                            | 75.5         | 422.2                      | 368.9                  | 447.70863 | 286.79352 |                          |
|              |                            | 76           | 442.9                      | 389.4                  | 469.29505 | 306.46071 | 406.30285                |
|              |                            | 76.5         | 463.3                      | 409.6                  | 489.41666 | 326.13456 |                          |
|              |                            | 77           | 483.2                      | 429.5                  | 510.39606 | 345.7653  | 448.7674                 |
|              |                            | 77.5         | 502.9                      | 449.1                  | 529.6871  | 365.31291 |                          |
|              |                            | 78           | 522.2                      | 468.5                  | 550.19963 | 384.75137 | 490.14311                |
|              |                            | 78.5         | 541.3                      | 487.5                  | 567.97487 | 404.06647 |                          |

|  |  |      |       |       |           |           |           |
|--|--|------|-------|-------|-----------|-----------|-----------|
|  |  | 79   | 560   | 506.4 | 588.43077 | 423.2522  | 530.47135 |
|  |  | 79.5 | 578.6 | 524.8 | 604.32739 | 442.30771 |           |
|  |  | 80   | 596.8 | 542.9 | 623.68368 | 461.23425 | 569.79137 |

**Table S9.** Heavy-ion fusion barrier-distributions calculations for  $^{37}\text{Cl} + ^{74}\text{Ge}$  (in the octupole vibrational state for the  $^{37}\text{Cl}$ :  $E^* = 4.0100$  MeV;  $\beta_{3-} = 0.3300$  and the quadrupole and hexadecapole rotational (deformed) state of the  $^{74}\text{Ge}$ :  $E^* = 0.5959$  MeV;  $\beta_2 = -0.2370$ ;  $\beta_4 = -0.0360$  frame-work) reaction.

| Exp.         |                                | Energy [MeV] | $d^2(E\sigma)/dE^2$ [mb / MeV] |         |                |
|--------------|--------------------------------|--------------|--------------------------------|---------|----------------|
| Energy [MeV] | $d^2(E\sigma)/dE^2$ [mb / MeV] |              | No Excitations                 | NRV     | Wong's Formula |
| 63.82        | 100.4                          | 60           | 0.00968                        | 0.00875 | 0.00848        |
| 65.15        | 265.5                          | 60.5         | 0.03083                        | 0.02972 |                |
| 66.49        | 460                            | 61           | 0.07695                        | 0.08613 | 0.05046        |
| 67.83        | 338.2                          | 61.5         | 0.228                          | 0.263   |                |
| 69.16        | 349.4                          | 62           | 0.995                          | 0.94    | 0.30044        |
| 70.5         | 459.6                          | 62.5         | 3.262                          | 2.724   |                |
| 71.83        | 77.89                          | 63           | 5.086                          | 4.909   | 1.78809        |
| 73.16        | 370.1                          | 63.5         | 2.293                          | 7.57    |                |
| 74.5         | 1131                           | 64           | 19.16                          | 30.45   | 10.61785       |
|              |                                | 64.5         | 132.2                          | 121.7   |                |
|              |                                | 65           | 398.4                          | 310.1   | 62.21675       |
|              |                                | 65.5         | 767                            | 555.2   |                |
|              |                                | 66           | 1108                           | 771     | 337.64453      |
|              |                                | 66.5         | 1298                           | 880.5   |                |
|              |                                | 67           | 1269                           | 860.5   | 1246.95831     |
|              |                                | 67.5         | 1041                           | 754.8   |                |
|              |                                | 68           | 714                            | 625.5   | 1447.37844     |
|              |                                | 68.5         | 401.4                          | 501.6   |                |
|              |                                | 69           | 173.5                          | 387.1   | 460.65874      |
|              |                                | 69.5         | 41.62                          | 284.1   |                |
|              |                                | 70           | -17.99                         | 204.7   | 88.16812       |
|              |                                | 70.5         | -35.09                         | 162.4   |                |
|              |                                | 71           | -33.13                         | 149.8   | 15.14945       |
|              |                                | 71.5         | -26.5                          | 141.9   |                |
|              |                                | 72           | -21.11                         | 120.8   | 2.55418        |
|              |                                | 72.5         | -17.95                         | 85.26   |                |
|              |                                | 73           | -17.11                         | 44.92   | 0.42925        |
|              |                                | 73.5         | -17.62                         | 12.61   |                |
|              |                                | 74           | -17.34                         | -4.509  | 0.0721         |
|              |                                | 74.5         | -15.84                         | -9.934  |                |
|              |                                | 75           | -14.99                         | -11.85  | 0.01211        |

|  |  |      |        |        |                          |
|--|--|------|--------|--------|--------------------------|
|  |  | 75.5 | -16.22 | -14.65 |                          |
|  |  | 76   | -19.25 | -17.12 | 0.00203                  |
|  |  | 76.5 | -22.21 | -16.04 |                          |
|  |  | 77   | -22.6  | -10.52 | $3.41574 \times 10^{-4}$ |
|  |  | 77.5 | -20.05 | -7.099 |                          |
|  |  | 78   | -13.47 | -4.641 | $5.73673 \times 10^{-5}$ |
|  |  | 78.5 | 0.106  | 11.72  |                          |
|  |  | 79   | -40.98 | -89.7  | $9.63482 \times 10^{-6}$ |
|  |  | 79.5 | -43.44 | -96.34 |                          |
|  |  | 80   | 19.13  | 46.51  | $1.61816 \times 10^{-6}$ |

**Table S10.** Heavy-ion fusion potential energies on mutual orientations in the reactions plane calculations for  $^{37}\text{Cl} + ^{74}\text{Ge}$ ,  $^{26}\text{Mg} + ^{85}\text{Rb}$ ,  $^{30}\text{Si} + ^{81}\text{Br}$ , and  $^{46}\text{Ca} + ^{65}\text{Cu}$  reactions.

| Reactions                                                                                                                                                                                                                                                                                                         | Orientation [°] | Radius [fm] | Energy [MeV] |
|-------------------------------------------------------------------------------------------------------------------------------------------------------------------------------------------------------------------------------------------------------------------------------------------------------------------|-----------------|-------------|--------------|
| $^{37}\text{Cl} + ^{74}\text{Ge}$<br>(in the quadrupole vibrational state for the $^{37}\text{Cl}$ : $E^* = 1.7266$ MeV; $\beta_{2+} = 0.1400$ and the quadrupole and hexadecapole rotational (deformed) state of the $^{74}\text{Ge}$ : $E^* = 0.5959$ MeV; $\beta_2 = -0.2370$ ; $\beta_4 = -0.0360$ framework) | $\pm 95$        | 11.29       | 65.5403      |
|                                                                                                                                                                                                                                                                                                                   | $\pm 91.2$      | 11.29       | 65.5269      |
|                                                                                                                                                                                                                                                                                                                   | $\pm 87.4$      | 11.29       | 65.5299      |
|                                                                                                                                                                                                                                                                                                                   | $\pm 83.6$      | 11.29       | 65.5495      |
|                                                                                                                                                                                                                                                                                                                   | $\pm 79.8$      | 11.29       | 65.5867      |
|                                                                                                                                                                                                                                                                                                                   | $\pm 76$        | 11.29       | 65.6434      |
|                                                                                                                                                                                                                                                                                                                   | $\pm 72.2$      | 11.29       | 65.7213      |
|                                                                                                                                                                                                                                                                                                                   | $\pm 68.4$      | 11.29       | 65.8215      |
|                                                                                                                                                                                                                                                                                                                   | $\pm 64.6$      | 11.29       | 65.944       |
|                                                                                                                                                                                                                                                                                                                   | $\pm 60.8$      | 11.29       | 66.0869      |
|                                                                                                                                                                                                                                                                                                                   | $\pm 57$        | 11.29       | 66.2462      |
|                                                                                                                                                                                                                                                                                                                   | $\pm 53.2$      | 11.29       | 66.4162      |
|                                                                                                                                                                                                                                                                                                                   | $\pm 49.4$      | 11.29       | 66.5895      |
|                                                                                                                                                                                                                                                                                                                   | $\pm 45.6$      | 11.29       | 66.7587      |
|                                                                                                                                                                                                                                                                                                                   | $\pm 41.8$      | 11.29       | 66.9165      |
|                                                                                                                                                                                                                                                                                                                   | $\pm 38$        | 11.29       | 67.0571      |
|                                                                                                                                                                                                                                                                                                                   | $\pm 34.2$      | 11.29       | 67.1768      |
|                                                                                                                                                                                                                                                                                                                   | $\pm 30.4$      | 11.29       | 67.2739      |
|                                                                                                                                                                                                                                                                                                                   | $\pm 26.6$      | 11.29       | 67.3489      |
|                                                                                                                                                                                                                                                                                                                   | $\pm 22.8$      | 11.29       | 67.4039      |
|                                                                                                                                                                                                                                                                                                                   | $\pm 19$        | 11.29       | 67.4420      |
|                                                                                                                                                                                                                                                                                                                   | $\pm 15.2$      | 11.29       | 67.4667      |
|                                                                                                                                                                                                                                                                                                                   | $\pm 11.4$      | 11.29       | 67.4816      |
|                                                                                                                                                                                                                                                                                                                   | $\pm 7.6$       | 11.29       | 67.4899      |
|                                                                                                                                                                                                                                                                                                                   | $\pm 3.8$       | 11.29       | 67.4938      |
|                                                                                                                                                                                                                                                                                                                   | 0               | 11.29       | 67.4950      |

|                                                                                  |       |       |         |
|----------------------------------------------------------------------------------|-------|-------|---------|
|                                                                                  | ±95   | 11.29 | 65.8705 |
|                                                                                  | ±91.2 | 11.29 | 65.8593 |
|                                                                                  | ±87.4 | 11.29 | 65.8618 |
|                                                                                  | ±83.6 | 11.29 | 65.8781 |
|                                                                                  | ±79.8 | 11.29 | 65.9094 |
|                                                                                  | ±76   | 11.29 | 65.9571 |
|                                                                                  | ±72.2 | 11.29 | 66.0231 |
|                                                                                  | ±68.4 | 11.29 | 66.1084 |
|                                                                                  | ±64.6 | 11.29 | 66.2131 |
|                                                                                  | ±60.8 | 11.29 | 66.3358 |
|                                                                                  | ±57   | 11.29 | 66.4729 |
| $^{37}\text{Cl} + ^{74}\text{Ge}$                                                | ±53.2 | 11.29 | 66.6194 |
| (in the quadrupole vibrational state for the $^{37}\text{Cl}$ : $E^* =$          | ±49.4 | 11.29 | 66.7689 |
| 3.0861 MeV; $\beta_{2+} = 0.2400$ and the quadrupole and                         | ±45.6 | 11.29 | 66.9147 |
| hexadecapole rotational (deformed) state of the                                  | ±41.8 | 11.29 | 67.0503 |
| $^{74}\text{Ge}$ : $E^* = 0.5959$ MeV; $\beta_2 = -0.2370$ ; $\beta_4 = -0.0360$ | ±38   | 11.29 | 67.1707 |
| framework)                                                                       | ±34.2 | 11.29 | 67.2725 |
|                                                                                  | ±30.4 | 11.29 | 67.3543 |
|                                                                                  | ±26.6 | 11.29 | 67.4166 |
|                                                                                  | ±22.8 | 11.29 | 67.4612 |
|                                                                                  | ±19   | 11.29 | 67.4911 |
|                                                                                  | ±15.2 | 11.29 | 67.5096 |
|                                                                                  | ±11.4 | 11.29 | 67.5200 |
|                                                                                  | ±7.6  | 11.29 | 67.5252 |
|                                                                                  | ±3.8  | 11.29 | 67.5273 |
|                                                                                  | 0     | 11.29 | 67.5279 |
|                                                                                  | ±95   | 11.29 | 66.1312 |
|                                                                                  | ±91.2 | 11.29 | 66.1214 |
|                                                                                  | ±87.4 | 11.29 | 66.1236 |
|                                                                                  | ±83.6 | 11.29 | 66.1380 |
|                                                                                  | ±79.8 | 11.29 | 66.1655 |
|                                                                                  | ±76   | 11.29 | 66.2077 |
| $^{37}\text{Cl} + ^{74}\text{Ge}$                                                | ±72.2 | 11.29 | 66.2662 |
| (in the octupole vibrational state for the $^{37}\text{Cl}$ : $E^* =$            | ±68.4 | 11.29 | 66.3421 |
| 3.1035 MeV; $\beta_{3-} = 0.3200$ and the quadrupole and                         | ±64.6 | 11.29 | 66.4356 |
| hexadecapole rotational (deformed) state of the                                  | ±60.8 | 11.29 | 66.5452 |
| $^{74}\text{Ge}$ : $E^* = 0.5959$ MeV; $\beta_2 = -0.2370$ ; $\beta_4 = -0.0360$ | ±57   | 11.29 | 66.6677 |
| framework)                                                                       | ±53.2 | 11.29 | 66.7985 |
|                                                                                  | ±49.4 | 11.29 | 66.9318 |
|                                                                                  | ±45.6 | 11.29 | 67.0611 |
|                                                                                  | ±41.8 | 11.29 | 67.1808 |
|                                                                                  | ±38   | 11.29 | 67.2862 |

|                                                                                                                                |       |       |         |
|--------------------------------------------------------------------------------------------------------------------------------|-------|-------|---------|
|                                                                                                                                | ±34.2 | 11.29 | 67.3742 |
|                                                                                                                                | ±30.4 | 11.29 | 67.4438 |
|                                                                                                                                | ±26.6 | 11.29 | 67.4955 |
|                                                                                                                                | ±22.8 | 11.29 | 67.5312 |
|                                                                                                                                | ±19   | 11.29 | 67.5539 |
|                                                                                                                                | ±15.2 | 11.29 | 67.5667 |
|                                                                                                                                | ±11.4 | 11.29 | 67.5728 |
|                                                                                                                                | ±7.6  | 11.29 | 67.5750 |
|                                                                                                                                | ±3.8  | 11.29 | 67.5754 |
|                                                                                                                                | 0     | 11.29 | 67.5754 |
|                                                                                                                                | ±95   | 11.15 | 66.2855 |
|                                                                                                                                | ±91.2 | 11.15 | 66.2722 |
|                                                                                                                                | ±87.4 | 11.15 | 66.2752 |
|                                                                                                                                | ±83.6 | 11.15 | 66.2947 |
|                                                                                                                                | ±79.8 | 11.15 | 66.3320 |
|                                                                                                                                | ±76   | 11.15 | 66.3887 |
|                                                                                                                                | ±72.2 | 11.15 | 66.4667 |
|                                                                                                                                | ±68.4 | 11.15 | 66.5673 |
|                                                                                                                                | ±64.6 | 11.15 | 66.6905 |
|                                                                                                                                | ±60.8 | 11.15 | 66.8344 |
|                                                                                                                                | ±57   | 11.15 | 66.9952 |
| $^{37}\text{Cl} + ^{74}\text{Ge}$                                                                                              | ±53.2 | 11.15 | 67.1671 |
| (in the octupole vibrational state for the $^{37}\text{Cl}$ : $E^* = 4.0100$ MeV; $\beta_{3-} = 0.3300$ and the quadrupole and | ±49.4 | 11.15 | 67.3428 |
| hexadecapole rotational (deformed) state of the                                                                                | ±45.6 | 11.15 | 67.5145 |
| $^{74}\text{Ge}$ : $E^* = 0.5959$ MeV; $\beta_2 = -0.2370$ ; $\beta_4 = -0.0360$                                               | ±41.8 | 11.15 | 67.6750 |
| framework)                                                                                                                     | ±38   | 11.15 | 67.8184 |
|                                                                                                                                | ±34.2 | 11.15 | 67.9407 |
|                                                                                                                                | ±30.4 | 11.15 | 68.0401 |
|                                                                                                                                | ±26.6 | 11.15 | 68.1172 |
|                                                                                                                                | ±22.8 | 11.15 | 68.1738 |
|                                                                                                                                | ±19   | 11.15 | 68.2132 |
|                                                                                                                                | ±15.2 | 11.15 | 68.2388 |
|                                                                                                                                | ±11.4 | 11.15 | 68.2544 |
|                                                                                                                                | ±7.6  | 11.15 | 68.2631 |
|                                                                                                                                | ±3.8  | 11.15 | 68.2673 |
|                                                                                                                                | 0     | 11.15 | 68.2685 |
|                                                                                                                                | ±95   | 10.77 | 55.7097 |
| $^{26}\text{Mg} + ^{85}\text{Rb}$                                                                                              | ±91.2 | 10.77 | 55.6201 |
| (in the quadrupole and hexadecapole rotational (de-                                                                            | ±87.4 | 10.77 | 55.6407 |
| formed) state for the $^{26}\text{Mg}$ : $E^* = 1.8087$ MeV; $\beta_2 =$                                                       | ±83.6 | 10.77 | 55.7684 |
| $-0.3510$ ; $\beta_4 = 0.1620$ and the quadrupole and hexade-                                                                  | ±79.8 | 10.77 | 55.9853 |
| capole rotational (deformed) state of the $^{85}\text{Rb}$ : $E^* =$                                                           | ±76   | 10.77 | 56.2629 |
| $0.1512$ MeV; $\beta_2 = 0.0640$ ; $\beta_4 = -0.0100$ framework)                                                              | ±72.2 | 10.77 | 56.5685 |

|                                                                                                                                                                                                                                                                                                                                                                                    |       |       |         |
|------------------------------------------------------------------------------------------------------------------------------------------------------------------------------------------------------------------------------------------------------------------------------------------------------------------------------------------------------------------------------------|-------|-------|---------|
|                                                                                                                                                                                                                                                                                                                                                                                    | ±68.4 | 10.77 | 56.8721 |
|                                                                                                                                                                                                                                                                                                                                                                                    | ±64.6 | 10.77 | 57.1503 |
|                                                                                                                                                                                                                                                                                                                                                                                    | ±60.8 | 10.77 | 57.3882 |
|                                                                                                                                                                                                                                                                                                                                                                                    | ±57   | 10.77 | 57.5789 |
|                                                                                                                                                                                                                                                                                                                                                                                    | ±53.2 | 10.77 | 57.7212 |
|                                                                                                                                                                                                                                                                                                                                                                                    | ±49.4 | 10.77 | 57.8177 |
|                                                                                                                                                                                                                                                                                                                                                                                    | ±45.6 | 10.77 | 57.8727 |
|                                                                                                                                                                                                                                                                                                                                                                                    | ±41.8 | 10.77 | 57.8911 |
|                                                                                                                                                                                                                                                                                                                                                                                    | ±38   | 10.77 | 57.8777 |
|                                                                                                                                                                                                                                                                                                                                                                                    | ±34.2 | 10.77 | 57.8366 |
|                                                                                                                                                                                                                                                                                                                                                                                    | ±30.4 | 10.77 | 57.7721 |
|                                                                                                                                                                                                                                                                                                                                                                                    | ±26.6 | 10.77 | 57.6886 |
|                                                                                                                                                                                                                                                                                                                                                                                    | ±22.8 | 10.77 | 57.5910 |
|                                                                                                                                                                                                                                                                                                                                                                                    | ±19   | 10.77 | 57.4860 |
|                                                                                                                                                                                                                                                                                                                                                                                    | ±15.2 | 10.77 | 57.3812 |
|                                                                                                                                                                                                                                                                                                                                                                                    | ±11.4 | 10.77 | 57.2857 |
|                                                                                                                                                                                                                                                                                                                                                                                    | ±7.6  | 10.77 | 57.2087 |
|                                                                                                                                                                                                                                                                                                                                                                                    | ±3.8  | 10.77 | 57.1587 |
|                                                                                                                                                                                                                                                                                                                                                                                    | 0     | 10.77 | 57.1413 |
|                                                                                                                                                                                                                                                                                                                                                                                    | ±95   | 10.44 | 62.7453 |
|                                                                                                                                                                                                                                                                                                                                                                                    | ±91.2 | 10.44 | 62.7378 |
|                                                                                                                                                                                                                                                                                                                                                                                    | ±87.4 | 10.44 | 62.7395 |
|                                                                                                                                                                                                                                                                                                                                                                                    | ±83.6 | 10.44 | 62.7503 |
|                                                                                                                                                                                                                                                                                                                                                                                    | ±79.8 | 10.44 | 62.7700 |
|                                                                                                                                                                                                                                                                                                                                                                                    | ±76   | 10.44 | 62.7982 |
|                                                                                                                                                                                                                                                                                                                                                                                    | ±72.2 | 10.44 | 62.8346 |
|                                                                                                                                                                                                                                                                                                                                                                                    | ±68.4 | 10.44 | 62.8784 |
|                                                                                                                                                                                                                                                                                                                                                                                    | ±64.6 | 10.44 | 62.9288 |
|                                                                                                                                                                                                                                                                                                                                                                                    | ±60.8 | 10.44 | 62.9851 |
| $^{30}\text{Si} + ^{81}\text{Br}$<br>(in the quadrupole and hexadecapole rotational (de-<br>formed) state for the $^{30}\text{Si}$ : $E^* = 2.2353$ MeV; $\beta_2 =$<br>$-0.2360$ ; $\beta_4 = 0.0400$ and the quadrupole and hexade-<br>capole rotational (deformed) state of the $^{81}\text{Br}$ : $E^* =$<br>$0.2760$ MeV; $\beta_2 = 0.1400$ ; $\beta_4 = -0.0300$ framework) | ±57   | 10.44 | 63.0461 |
|                                                                                                                                                                                                                                                                                                                                                                                    | ±53.2 | 10.44 | 63.1107 |
|                                                                                                                                                                                                                                                                                                                                                                                    | ±49.4 | 10.44 | 63.1778 |
|                                                                                                                                                                                                                                                                                                                                                                                    | ±45.6 | 10.44 | 63.2462 |
|                                                                                                                                                                                                                                                                                                                                                                                    | ±41.8 | 10.44 | 63.3146 |
|                                                                                                                                                                                                                                                                                                                                                                                    | ±38   | 10.44 | 63.3817 |
|                                                                                                                                                                                                                                                                                                                                                                                    | ±34.2 | 10.44 | 63.4464 |
|                                                                                                                                                                                                                                                                                                                                                                                    | ±30.4 | 10.44 | 63.5075 |
|                                                                                                                                                                                                                                                                                                                                                                                    | ±26.6 | 10.44 | 63.5640 |
|                                                                                                                                                                                                                                                                                                                                                                                    | ±22.8 | 10.44 | 63.6149 |
|                                                                                                                                                                                                                                                                                                                                                                                    | ±19   | 10.44 | 63.6594 |
|                                                                                                                                                                                                                                                                                                                                                                                    | ±15.2 | 10.44 | 63.6968 |
|                                                                                                                                                                                                                                                                                                                                                                                    | ±11.4 | 10.44 | 63.7265 |
|                                                                                                                                                                                                                                                                                                                                                                                    | ±7.6  | 10.44 | 63.7480 |

|                                                                                                                                  |            |       |         |
|----------------------------------------------------------------------------------------------------------------------------------|------------|-------|---------|
|                                                                                                                                  | $\pm 3.8$  | 10.44 | 63.7610 |
|                                                                                                                                  | 0          | 10.44 | 63.7654 |
|                                                                                                                                  | $\pm 95$   | 10.75 | 72.5203 |
|                                                                                                                                  | $\pm 91.2$ | 10.75 | 72.5043 |
|                                                                                                                                  | $\pm 87.4$ | 10.75 | 72.5079 |
|                                                                                                                                  | $\pm 83.6$ | 10.75 | 72.5311 |
|                                                                                                                                  | $\pm 79.8$ | 10.75 | 72.5731 |
|                                                                                                                                  | $\pm 76$   | 10.75 | 72.6329 |
|                                                                                                                                  | $\pm 72.2$ | 10.75 | 72.7087 |
|                                                                                                                                  | $\pm 68.4$ | 10.75 | 72.7984 |
|                                                                                                                                  | $\pm 64.6$ | 10.75 | 72.8994 |
|                                                                                                                                  | $\pm 60.8$ | 10.75 | 73.0092 |
|                                                                                                                                  | $\pm 57$   | 10.75 | 73.1245 |
| $^{46}\text{Ca} + ^{65}\text{Cu}$                                                                                                | $\pm 53.2$ | 10.75 | 73.2425 |
| (in the quadrupole vibrational state for the $^{46}\text{Ca}$ : $E^* = 1.3460$ MeV; $\beta_{2+} = 0.1468$ and the quadrupole and | $\pm 49.4$ | 10.75 | 73.3603 |
| hexadecapole rotational (deformed) state of the                                                                                  | $\pm 45.6$ | 10.75 | 73.4751 |
| $^{65}\text{Cu}$ : $E^* = 1.4818$ MeV; $\beta_2 = -0.1250$ ; $\beta_4 = -0.0050$                                                 | $\pm 41.8$ | 10.75 | 73.5846 |
| framework)                                                                                                                       | $\pm 38$   | 10.75 | 73.6869 |
|                                                                                                                                  | $\pm 34.2$ | 10.75 | 73.7805 |
|                                                                                                                                  | $\pm 30.4$ | 10.75 | 73.8642 |
|                                                                                                                                  | $\pm 26.6$ | 10.75 | 73.9376 |
|                                                                                                                                  | $\pm 22.8$ | 10.75 | 74.0003 |
|                                                                                                                                  | $\pm 19$   | 10.75 | 74.0525 |
|                                                                                                                                  | $\pm 15.2$ | 10.75 | 74.0945 |
|                                                                                                                                  | $\pm 11.4$ | 10.75 | 74.1265 |
|                                                                                                                                  | $\pm 7.6$  | 10.75 | 74.1490 |
|                                                                                                                                  | $\pm 3.8$  | 10.75 | 74.1624 |
|                                                                                                                                  | 0          | 10.75 | 74.1668 |
|                                                                                                                                  | $\pm 95$   | 10.75 | 72.5346 |
|                                                                                                                                  | $\pm 91.2$ | 10.75 | 72.5155 |
|                                                                                                                                  | $\pm 87.4$ | 10.75 | 72.5199 |
|                                                                                                                                  | $\pm 83.6$ | 10.75 | 72.5475 |
|                                                                                                                                  | $\pm 79.8$ | 10.75 | 72.5976 |
| $^{46}\text{Ca} + ^{65}\text{Cu}$                                                                                                | $\pm 76$   | 10.75 | 72.6689 |
| (in the octupole vibrational state for the $^{46}\text{Ca}$ : $E^* = 3.6140$ MeV; $\beta_{3-} = 0.2040$ and the quadrupole and   | $\pm 72.2$ | 10.75 | 72.7595 |
| hexadecapole rotational (deformed) state of the                                                                                  | $\pm 68.4$ | 10.75 | 72.8669 |
| $^{65}\text{Cu}$ : $E^* = 1.4818$ MeV; $\beta_2 = -0.1250$ ; $\beta_4 = -0.0050$                                                 | $\pm 64.6$ | 10.75 | 72.9881 |
| framework)                                                                                                                       | $\pm 60.8$ | 10.75 | 73.1200 |
|                                                                                                                                  | $\pm 57$   | 10.75 | 73.2592 |
|                                                                                                                                  | $\pm 53.2$ | 10.75 | 73.4019 |
|                                                                                                                                  | $\pm 49.4$ | 10.75 | 73.5449 |
|                                                                                                                                  | $\pm 45.6$ | 10.75 | 73.6848 |
|                                                                                                                                  | $\pm 41.8$ | 10.75 | 73.8189 |

|  |            |       |         |
|--|------------|-------|---------|
|  | $\pm 38$   | 10.75 | 73.9446 |
|  | $\pm 34.2$ | 10.75 | 74.0602 |
|  | $\pm 30.4$ | 10.75 | 74.1643 |
|  | $\pm 26.6$ | 10.75 | 74.2559 |
|  | $\pm 22.8$ | 10.75 | 74.3348 |
|  | $\pm 19$   | 10.75 | 74.4007 |
|  | $\pm 15.2$ | 10.75 | 74.4540 |
|  | $\pm 11.4$ | 10.75 | 74.4949 |
|  | $\pm 7.6$  | 10.75 | 74.5237 |
|  | $\pm 3.8$  | 10.75 | 74.5409 |
|  | 0          | 10.75 | 74.5466 |

**Table S11.** Heavy-ion fusion cross-section calculations for  $^{26}\text{Mg} + ^{85}\text{Rb}$  (in the quadrupole and hexadecapole rotational (deformed) state for the  $^{26}\text{Mg}$ :  $E^* = 1.8087$  MeV;  $\beta_2 = -0.3510$ ;  $\beta_4 = 0.1620$  and the quadrupole and hexadecapole rotational (deformed) state of the  $^{85}\text{Rb}$ :  $E^* = 0.1512$  MeV;  $\beta_2 = 0.0640$ ;  $\beta_4 = -0.0100$  framework) reaction.

| Exp.         |                            | Energy [MeV] | $\sigma_{\text{fus}}$ [mb] |                        |                          |           |                          |
|--------------|----------------------------|--------------|----------------------------|------------------------|--------------------------|-----------|--------------------------|
|              |                            |              | No Excitations             | NRV                    | CCFULL                   | CCDEF     | Wong's Formula           |
| Energy [MeV] | $\sigma_{\text{fus}}$ [mb] | 50           | $2.826 \times 10^{-5}$     | $5.525 \times 10^{-4}$ | $6.90747 \times 10^{-4}$ | 0.00421   | $1.95343 \times 10^{-4}$ |
|              |                            | 50.5         | $8.519 \times 10^{-4}$     | 0.00155                | 0.00194                  | 0.00982   |                          |
|              |                            | 51           | $2.504 \times 10^{-4}$     | 0.00423                | 0.00538                  | 0.02289   | 0.00103                  |
|              |                            | 51.5         | $7.242 \times 10^{-4}$     | 0.01132                | 0.01471                  | 0.05332   |                          |
|              |                            | 52           | 0.00205                    | 0.02966                | 0.03942                  | 0.12393   | 0.00545                  |
|              |                            | 52.5         | 0.00565                    | 0.07569                | 0.10265                  | 0.28656   |                          |
|              |                            | 53           | 0.01534                    | 0.19                   | 0.25816                  | 0.65495   | 0.02877                  |
|              |                            | 53.5         | 0.04083                    | 0.466                  | 0.62383                  | 1.46013   |                          |
|              |                            | 54           | 0.106                      | 1.109                  | 1.44353                  | 3.10476   | 0.15181                  |
|              |                            | 54.5         | 0.27                       | 2.561                  | 3.19346                  | 6.12541   |                          |
|              |                            | 55           | 0.677                      | 5.649                  | 6.71038                  | 10.99507  | 0.79559                  |
|              |                            | 55.5         | 1.644                      | 11.52                  | 13.17439                 | 17.92387  |                          |
|              |                            | 56           | 3.868                      | 21.31                  | 23.64915                 | 26.85896  | 4.02116                  |
|              |                            | 56.5         | 8.66                       | 35.32                  | 38.25786                 | 37.6262   |                          |
|              |                            | 57           | 17.75                      | 52.6                   | 56.00392                 | 50.0692   | 17.42606                 |
|              |                            | 57.5         | 32.53                      | 71.91                  | 75.61677                 | 64.12879  |                          |
|              |                            | 58           | 52.71                      | 92.15                  | 96.13604                 | 79.85916  | 51.77034                 |
|              |                            | 58.5         | 76.39                      | 112.6                  | 117.05209                | 97.37302  |                          |
|              |                            | 59           | 101.8                      | 133                    | 138.23931                | 116.71366 | 101.58804                |
|              |                            | 59.5         | 127.9                      | 153.8                  | 159.81651                | 137.71835 |                          |
|              |                            | 60           | 154                        | 175.4                  | 182.06898                | 160.00323 | 155.16363                |
| 60.5         | 179.8                      | 198          | 205.119                    | 183.09726              |                          |           |                          |
| 61           | 205.3                      | 221.4        | 228.80079                  | 206.58721              | 208.13232                |           |                          |
| 61.5         | 230.3                      | 245.4        | 252.8437                   | 230.18064              |                          |           |                          |

|  |  |      |       |       |           |           |           |
|--|--|------|-------|-------|-----------|-----------|-----------|
|  |  | 62   | 254.8 | 269.4 | 277.0254  | 253.70142 | 259.60887 |
|  |  | 62.5 | 278.9 | 293.4 | 301.16713 | 277.05795 |           |
|  |  | 63   | 302.5 | 317   | 325.11173 | 300.2123  | 309.49105 |
|  |  | 63.5 | 325.7 | 340.3 | 348.7898  | 323.15977 |           |
|  |  | 64   | 348.5 | 363.2 | 372.08839 | 345.91643 | 357.82169 |
|  |  | 64.5 | 370.9 | 385.7 | 394.99726 | 368.50802 |           |
|  |  | 65   | 392.8 | 407.8 | 417.52193 | 390.9556  | 404.66656 |
|  |  | 65.5 | 414.3 | 429.6 | 439.58936 | 413.26093 |           |
|  |  | 66   | 435.4 | 450.9 | 461.29867 | 435.40364 | 450.09214 |
|  |  | 66.5 | 456.1 | 471.9 | 482.48695 | 457.3529  |           |
|  |  | 67   | 476.5 | 492.5 | 503.38123 | 479.08119 | 494.16177 |
|  |  | 67.5 | 496.5 | 512.7 | 524.1007  | 500.57135 |           |
|  |  | 68   | 516.2 | 532.6 | 543.8172  | 521.81749 | 536.93525 |
|  |  | 68.5 | 535.5 | 552.1 | 563.6717  | 542.82288 |           |
|  |  | 69   | 554.5 | 571.3 | 583.45626 | 563.59647 | 578.46892 |
|  |  | 69.5 | 573.1 | 590.1 | 601.89532 | 584.14789 |           |
|  |  | 70   | 591.4 | 608.6 | 620.71372 | 604.48123 | 618.81591 |

**Table S12.** Heavy-ion fusion barrier-distributions calculations for  $^{26}\text{Mg} + ^{85}\text{Rb}$  (in the quadrupole and hexadecapole rotational (deformed) state for the  $^{26}\text{Mg}$ :  $E^* = 1.8087$  MeV;  $\beta_2 = -0.3510$ ;  $\beta_4 = 0.1620$  and the quadrupole and hexadecapole rotational (deformed) state of the  $^{85}\text{Rb}$ :  $E^* = 0.1512$  MeV;  $\beta_2 = 0.0640$ ;  $\beta_4 = -0.0100$  framework) reaction.

| Exp.         |                                | Energy [MeV] | $d^2(E\sigma)/dE^2$ [mb / MeV] |         |                |
|--------------|--------------------------------|--------------|--------------------------------|---------|----------------|
|              |                                |              | No Excitations                 | NRV     | Wong's Formula |
| Energy [MeV] | $d^2(E\sigma)/dE^2$ [mb / MeV] | 50           | 0.00446                        | 0.06546 | 0.02769        |
|              |                                | 50.5         | 0.01781                        | 0.243   |                |
|              |                                | 51           | 0.05345                        | 0.829   | 0.14909        |
|              |                                | 51.5         | 0.128                          | 2.389   |                |
|              |                                | 52           | 0.37                           | 5.296   | 0.80269        |
|              |                                | 52.5         | 1.322                          | 8.903   |                |
|              |                                | 53           | 3.769                          | 20.85   | 4.31728        |
|              |                                | 53.5         | 6.301                          | 74.56   |                |
|              |                                | 54           | 7.398                          | 212.2   | 23.09621       |
|              |                                | 54.5         | 30.25                          | 430.6   |                |
|              |                                | 55           | 138.6                          | 666.1   | 120.07608      |
|              |                                | 55.5         | 377.4                          | 834.2   |                |
|              |                                | 56           | 700.2                          | 870.5   | 540.35958      |
|              |                                | 56.5         | 994.6                          | 761.8   |                |
|              |                                | 57           | 1154                           | 559.2   | 1360.7429      |
|              |                                | 57.5         | 1120                           | 346.5   |                |
|              |                                | 58           | 911.5                          | 195.8   | 1003.23138     |

|  |  |      |        |        |                          |
|--|--|------|--------|--------|--------------------------|
|  |  | 58.5 | 621.4  | 141.5  |                          |
|  |  | 59   | 351.7  | 169.1  | 279.99945                |
|  |  | 59.5 | 156.3  | 230.3  |                          |
|  |  | 60   | 42.76  | 274.2  | 56.64895                 |
|  |  | 60.5 | -9.106 | 270.5  |                          |
|  |  | 61   | -25.92 | 220.4  | 10.69269                 |
|  |  | 61.5 | -27.15 | 148.4  |                          |
|  |  | 62   | -23.3  | 81.04  | 1.99165                  |
|  |  | 62.5 | -19.26 | 32.34  |                          |
|  |  | 63   | -17.17 | 4.087  | 0.37005                  |
|  |  | 63.5 | -17.3  | -9.015 |                          |
|  |  | 64   | -18.68 | -13.78 | 0.06872                  |
|  |  | 64.5 | -19.82 | -14.73 |                          |
|  |  | 65   | -19.43 | -14.49 | 0.01276                  |
|  |  | 65.5 | -17.95 | -14.79 |                          |
|  |  | 66   | -17    | -15.75 | 0.00237                  |
|  |  | 66.5 | -17.06 | -16.97 |                          |
|  |  | 67   | -16.87 | -17.88 | $4.40071 \times 10^{-4}$ |
|  |  | 67.5 | -16.27 | -18.17 |                          |
|  |  | 68   | -12.45 | -14.67 | $8.17194 \times 10^{-5}$ |
|  |  | 68.5 | 2.082  | 0.184  |                          |
|  |  | 69   | -60.29 | -57.69 | $1.51749 \times 10^{-5}$ |
|  |  | 69.5 | -63.55 | -59.63 |                          |
|  |  | 70   | 28.66  | 28.92  | $2.81792 \times 10^{-6}$ |

**Table S13.** Heavy-ion fusion cross-section calculations for  $^{30}\text{Si} + ^{81}\text{Br}$  (in the quadrupole and hexadecapole rotational (deformed) state for the  $^{30}\text{Si}$ :  $E^* = 2.2353$  MeV;  $\beta_2 = -0.2360$ ;  $\beta_4 = 0.0400$  and the quadrupole and hexadecapole rotational (deformed) state of the  $^{81}\text{Br}$ :  $E^* = 0.2760$  MeV;  $\beta_2 = 0.1400$ ;  $\beta_4 = -0.0300$  framework) reaction.

| Exp.         |                            | Energy [MeV] | $\sigma_{\text{fus}}$ [mb] |                        |                          |                         |                          |
|--------------|----------------------------|--------------|----------------------------|------------------------|--------------------------|-------------------------|--------------------------|
|              |                            |              | No Excitations             | NRV                    | CCFULL                   | CCDEF                   | Wong's Formula           |
| Energy [MeV] | $\sigma_{\text{fus}}$ [mb] | 55           | $6.389 \times 10^{-6}$     | $8.787 \times 10^{-5}$ | $1.04862 \times 10^{-4}$ | $5.2762 \times 10^{-4}$ | $5.22663 \times 10^{-5}$ |
|              |                            | 55.5         | $1.939 \times 10^{-5}$     | $2.495 \times 10^{-4}$ | $2.89813 \times 10^{-4}$ | 0.00123                 |                          |
|              |                            | 56           | $5.81 \times 10^{-5}$      | $6.976 \times 10^{-4}$ | $7.93524 \times 10^{-4}$ | 0.00289                 | $2.81527 \times 10^{-4}$ |
|              |                            | 56.5         | $1.706 \times 10^{-4}$     | 0.00191                | 0.00216                  | 0.00676                 |                          |
|              |                            | 57           | $4.886 \times 10^{-4}$     | 0.0051                 | 0.00582                  | 0.01583                 | 0.00152                  |
|              |                            | 57.5         | 0.00138                    | 0.01344                | 0.01558                  | 0.037                   |                          |
|              |                            | 58           | 0.00383                    | 0.03478                | 0.0412                   | 0.0863                  | 0.00817                  |
|              |                            | 58.5         | 0.01036                    | 0.08793                | 0.10679                  | 0.20027                 |                          |
|              |                            | 59           | 0.02761                    | 0.219                  | 0.26932                  | 0.45929                 | 0.04405                  |
|              |                            | 59.5         | 0.07247                    | 0.534                  | 0.65476                  | 1.02749                 |                          |

|  |  |      |       |       |           |           |           |
|--|--|------|-------|-------|-----------|-----------|-----------|
|  |  | 60   | 0.185 | 1.26  | 1.52012   | 2.19509   | 0.23688   |
|  |  | 60.5 | 0.466 | 2.854 | 3.34162   | 4.37123   |           |
|  |  | 61   | 1.154 | 6.089 | 6.86916   | 7.99396   | 1.25812   |
|  |  | 61.5 | 2.753 | 11.81 | 12.97904  | 13.43801  |           |
|  |  | 62   | 6.288 | 20.63 | 22.26098  | 20.99764  | 6.27406   |
|  |  | 62.5 | 13.4  | 32.76 | 34.69386  | 30.89193  |           |
|  |  | 63   | 25.52 | 47.82 | 49.81914  | 43.22489  | 24.75762  |
|  |  | 63.5 | 42.84 | 65.32 | 67.08308  | 57.92752  |           |
|  |  | 64   | 64.08 | 84.75 | 86.04833  | 74.75715  | 63.09575  |
|  |  | 64.5 | 87.28 | 105.4 | 106.40329 | 93.36505  |           |
|  |  | 65   | 111.2 | 126.8 | 127.83205 | 113.38059 | 111.3388  |
|  |  | 65.5 | 135.4 | 148.7 | 149.98814 | 134.46066 |           |
|  |  | 66   | 159.4 | 171   | 172.53047 | 156.29328 | 161.00367 |
|  |  | 66.5 | 183   | 193.3 | 195.22928 | 178.58782 |           |
|  |  | 67   | 206.4 | 215.6 | 217.95512 | 201.08934 | 209.74937 |
|  |  | 67.5 | 229.3 | 238   | 240.60306 | 223.61029 |           |
|  |  | 68   | 251.8 | 260.2 | 263.12823 | 246.04004 | 257.16423 |
|  |  | 68.5 | 274   | 282.2 | 285.47711 | 268.32365 |           |
|  |  | 69   | 295.7 | 304   | 307.59137 | 290.43409 | 303.22328 |
|  |  | 69.5 | 317.1 | 325.5 | 329.43232 | 312.35475 |           |
|  |  | 70   | 338.1 | 346.6 | 350.93916 | 334.0736  | 347.96969 |
|  |  | 70.5 | 358.7 | 367.4 | 372.14583 | 355.58299 |           |
|  |  | 71   | 379   | 387.9 | 392.97092 | 376.87929 | 391.45624 |
|  |  | 71.5 | 399   | 408.1 | 413.47094 | 397.96042 | -         |
|  |  | 72   | 418.6 | 427.9 | 433.63575 | 418.82372 | 433.73494 |
|  |  | 72.5 | 437.9 | 447.3 | 453.43798 | 439.46671 |           |
|  |  | 73   | 456.8 | 466.5 | 473.06106 | 459.88874 | 474.85534 |
|  |  | 73.5 | 475.5 | 485.4 | 492.10743 | 480.09069 |           |
|  |  | 74   | 493.9 | 503.9 | 511.11595 | 500.07302 | 514.86438 |
|  |  | 74.5 | 511.9 | 522.1 | 529.56041 | 519.83466 |           |
|  |  | 75   | 529.7 | 540   | 547.84901 | 539.37339 | 553.80651 |

**Table S14.** Heavy-ion fusion barrier-distributions calculations for  $^{30}\text{Si} + ^{81}\text{Br}$  (in the quadrupole and hexadecapole rotational (deformed) state for the  $^{30}\text{Si}$ :  $E^* = 2.2353$  MeV;  $\beta_2 = -0.2360$ ;  $\beta_4 = 0.0400$  and the quadrupole and hexadecapole rotational (deformed) state of the  $^{81}\text{Br}$ :  $E^* = 0.2760$  MeV;  $\beta_2 = 0.1400$ ;  $\beta_4 = -0.0300$  framework) reaction.

| Exp.         |                                | Energy [MeV] | $d^2(E\sigma)/dE^2$ [mb / MeV] |         |                |
|--------------|--------------------------------|--------------|--------------------------------|---------|----------------|
|              |                                |              | No Excitations                 | NRV     | Wong's Formula |
| Energy [MeV] | $d^2(E\sigma)/dE^2$ [mb / MeV] | 55           | 0.00103                        | 0.01378 | 0.00833        |

|  |  |      |         |        |                          |
|--|--|------|---------|--------|--------------------------|
|  |  | 55.5 | 0.00422 | 0.0481 |                          |
|  |  | 56   | 0.0146  | 0.14   | 0.04566                  |
|  |  | 56.5 | 0.04094 | 0.382  |                          |
|  |  | 57   | 0.09987 | 1.115  | 0.25042                  |
|  |  | 57.5 | 0.259   | 2.908  |                          |
|  |  | 58   | 0.906   | 6.01   | 1.37284                  |
|  |  | 58.5 | 2.933   | 11.9   |                          |
|  |  | 59   | 5.743   | 33.65  | 7.51331                  |
|  |  | 59.5 | 6.186   | 102.7  |                          |
|  |  | 60   | 17.24   | 242.7  | 40.73414                 |
|  |  | 60.5 | 94.79   | 434.5  |                          |
|  |  | 61   | 300.3   | 624.6  | 209.97927                |
|  |  | 61.5 | 615.8   | 762.2  |                          |
|  |  | 62   | 935.9   | 817.1  | 845.17429                |
|  |  | 62.5 | 1143    | 785.4  |                          |
|  |  | 63   | 1163    | 688.8  | 1453.18703               |
|  |  | 63.5 | 991.8   | 557.2  |                          |
|  |  | 64   | 705.8   | 419.9  | 683.96304                |
|  |  | 64.5 | 417.1   | 303.7  |                          |
|  |  | 65   | 198.6   | 218.8  | 157.66169                |
|  |  | 65.5 | 65.32   | 159.3  |                          |
|  |  | 66   | 0.189   | 119.7  | 30.09717                 |
|  |  | 66.5 | -22.9   | 94.21  |                          |
|  |  | 67   | -26.57  | 74.17  | 5.53457                  |
|  |  | 67.5 | -24.05  | 55.38  |                          |
|  |  | 68   | -20.93  | 37.81  | 1.01072                  |
|  |  | 68.5 | -18.89  | 21.33  |                          |
|  |  | 69   | -18.04  | 6.673  | 0.18434                  |
|  |  | 69.5 | -17.77  | -4.256 |                          |
|  |  | 70   | -17.73  | -10.82 | 0.03361                  |
|  |  | 70.5 | -18.22  | -14.25 |                          |
|  |  | 71   | -18.87  | -16.35 | 0.00613                  |
|  |  | 71.5 | -18.42  | -18    |                          |
|  |  | 72   | -15.94  | -17.74 | 0.00112                  |
|  |  | 72.5 | -13.66  | -15.97 |                          |
|  |  | 73   | -10.05  | -11.53 | $2.03779 \times 10^{-4}$ |
|  |  | 73.5 | 4.534   | 4.069  |                          |
|  |  | 74   | -68.11  | -61.79 | $3.71566 \times 10^{-5}$ |
|  |  | 74.5 | -72.49  | -65.29 |                          |
|  |  | 75   | 32.55   | 32.64  | $6.77503 \times 10^{-6}$ |

**Table S15.** Heavy-ion fusion cross-section calculations for  $^{46}\text{Ca} + ^{65}\text{Cu}$  (in the quadrupole vibrational state for the  $^{46}\text{Ca}$ :  $E^* = 1.3460$  MeV;  $\beta_{2+} = 0.1468$  and the quadrupole and hexadecapole rotational (deformed) state of the  $^{65}\text{Cu}$ :  $E^* = 1.4818$  MeV;  $\beta_2 = -0.1250$ ;  $\beta_4 = -0.0050$  framework) reaction.

| Exp.         |                            | Energy [MeV] | $\sigma_{\text{fus}}$ [mb] |                        |                          |                          |                          |
|--------------|----------------------------|--------------|----------------------------|------------------------|--------------------------|--------------------------|--------------------------|
|              |                            |              | No Excitations             | NRV                    | CCFULL                   | CCDEF                    | Wong's Formula           |
| Energy [MeV] | $\sigma_{\text{fus}}$ [mb] | 65           | $9.247 \times 10^{-7}$     | $1.144 \times 10^{-6}$ | $9.34205 \times 10^{-6}$ | $7.0829 \times 10^{-5}$  | $7.93827 \times 10^{-6}$ |
|              |                            | 65.5         | $2.911 \times 10^{-6}$     | $3.588 \times 10^{-6}$ | $2.64889 \times 10^{-5}$ | $1.72025 \times 10^{-4}$ |                          |
|              |                            | 66           | $9.076 \times 10^{-6}$     | $1.112 \times 10^{-5}$ | $7.36098 \times 10^{-5}$ | $4.17833 \times 10^{-4}$ | $4.67868 \times 10^{-5}$ |
|              |                            | 66.5         | $2.756 \times 10^{-5}$     | $3.35 \times 10^{-5}$  | $2.02227 \times 10^{-4}$ | 0.00101                  |                          |
|              |                            | 67           | $8.231 \times 10^{-5}$     | $9.887 \times 10^{-5}$ | $5.53035 \times 10^{-4}$ | 0.00247                  | $2.75816 \times 10^{-4}$ |
|              |                            | 67.5         | $2.437 \times 10^{-4}$     | $2.887 \times 10^{-4}$ | 0.00151                  | 0.00599                  |                          |
|              |                            | 68           | $7.028 \times 10^{-4}$     | $8.191 \times 10^{-4}$ | 0.00415                  | 0.01453                  | 0.00163                  |
|              |                            | 68.5         | 0.00199                    | 0.00227                | 0.01141                  | 0.03522                  |                          |
|              |                            | 69           | 0.00559                    | 0.00625                | 0.0312                   | 0.08502                  | 0.00959                  |
|              |                            | 69.5         | 0.01531                    | 0.01677                | 0.08419                  | 0.2034                   |                          |
|              |                            | 70           | 0.04117                    | 0.04419                | 0.22132                  | 0.47695                  | 0.05653                  |
|              |                            | 70.5         | 0.11                       | 0.116                  | 0.55934                  | 1.07552                  |                          |
|              |                            | 71           | 0.288                      | 0.298                  | 1.34311                  | 2.27764                  | 0.33186                  |
|              |                            | 71.5         | 0.736                      | 0.745                  | 3.0362                   | 4.45172                  |                          |
|              |                            | 72           | 1.858                      | 1.821                  | 6.40348                  | 8.00529                  | 1.90242                  |
|              |                            | 72.5         | 4.466                      | 4.195                  | 12.4095                  | 13.35016                 |                          |
|              |                            | 73           | 9.971                      | 8.855                  | 21.73814                 | 20.88373                 | 9.66831                  |
|              |                            | 73.5         | 20.03                      | 16.78                  | 34.31923                 | 30.93262                 |                          |
|              |                            | 74           | 34.85                      | 27.99                  | 49.61964                 | 43.62228                 | 33.93025                 |
|              |                            | 74.5         | 53.26                      | 41.86                  | 67.0936                  | 58.76439                 |                          |
|              |                            | 75           | 73.74                      | 58                     | 86.10597                 | 75.91704                 | 73.48371                 |
|              |                            | 75.5         | 94.97                      | 75.75                  | 105.98409                | 94.56255                 |                          |
|              |                            | 76           | 116.4                      | 94.42                  | 126.26688                | 114.23071                | 117.50586                |
|              |                            | 76.5         | 137.7                      | 113.7                  | 146.73534                | 134.53312                |                          |
|              |                            | 77           | 158.7                      | 133.1                  | 167.29636                | 155.16244                | 161.48408                |
|              |                            | 77.5         | 179.5                      | 152.7                  | 187.90051                | 175.89388                |                          |
|              |                            | 78           | 200                        | 172.4                  | 208.49639                | 196.58679                | 204.52262                |
|              |                            | 78.5         | 220.1                      | 192.1                  | 229.00936                | 217.17024                |                          |
|              |                            | 79           | 240                        | 211.6                  | 249.35406                | 237.61556                | 246.50278                |
|              |                            | 79.5         | 259.6                      | 230.9                  | 269.46777                | 257.91015                |                          |
|              |                            | 80           | 278.9                      | 249.9                  | 289.30045                | 278.04228                | 287.43859                |
| 80.5         | 297.8                      | 268.7        | 308.87224                  | 297.99871              |                          |                          |                          |
| 81           | 316.5                      | 287.3        | 328.15885                  | 317.76784              | 327.36449                |                          |                          |
| 81.5         | 334.9                      | 305.6        | 347.173                    | 337.34161              |                          |                          |                          |
| 82           | 353                        | 323.6        | 365.88653                  | 356.71528              | 366.31673                |                          |                          |
| 82.5         | 370.9                      | 341.3        | 384.35417                  | 375.88682              |                          |                          |                          |

|  |  |      |       |       |           |           |           |
|--|--|------|-------|-------|-----------|-----------|-----------|
|  |  | 83   | 388.4 | 358.8 | 402.49572 | 394.85694 | 404.33038 |
|  |  | 83.5 | 405.7 | 376   | 420.44132 | 413.62872 |           |
|  |  | 84   | 422.7 | 393   | 438.04143 | 432.20606 | 441.43895 |
|  |  | 84.5 | 439.6 | 409.8 | 455.48662 | 450.59137 |           |
|  |  | 85   | 456.2 | 426.2 | 472.54715 | 468.78465 | 477.67438 |

**Table S16.** Heavy-ion fusion barrier-distributions calculations for  $^{46}\text{Ca} + ^{65}\text{Cu}$  (in the quadrupole vibrational state for the  $^{46}\text{Ca}$ :  $E^* = 1.3460$  MeV;  $\beta_{2+} = 0.1468$  and the quadrupole and hexadecapole rotational (deformed) state of the  $^{65}\text{Cu}$ :  $E^* = 1.4818$  MeV;  $\beta_2 = -0.1250$ ;  $\beta_4 = -0.0050$  framework) reaction.

| Exp.         |                                | Energy [MeV] | $d^2(E\sigma)/dE^2$ [mb / MeV] |                        |                |
|--------------|--------------------------------|--------------|--------------------------------|------------------------|----------------|
|              |                                |              | No Excitations                 | NRV                    | Wong's Formula |
| Energy [MeV] | $d^2(E\sigma)/dE^2$ [mb / MeV] | 65           | $1.902 \times 10^{-4}$         | $2.387 \times 10^{-4}$ | 0.00165        |
|              |                                | 65.5         | $7.009 \times 10^{-4}$         | $9.018 \times 10^{-4}$ |                |
|              |                                | 66           | 0.00255                        | 0.00316                | 0.00988        |
|              |                                | 66.5         | 0.00877                        | 0.01012                |                |
|              |                                | 67           | 0.02547                        | 0.02852                | 0.05916        |
|              |                                | 67.5         | 0.0595                         | 0.07145                |                |
|              |                                | 68           | 0.147                          | 0.192                  | 0.35398        |
|              |                                | 68.5         | 0.547                          | 0.619                  |                |
|              |                                | 69           | 2.091                          | 1.944                  | 2.11722        |
|              |                                | 69.5         | 4.706                          | 4.311                  |                |
|              |                                | 70           | 3.861                          | 6.257                  | 12.62815       |
|              |                                | 70.5         | 5.916                          | 15.98                  |                |
|              |                                | 71           | 65.45                          | 71.62                  | 74.08258       |
|              |                                | 71.5         | 258.6                          | 218.7                  |                |
|              |                                | 72           | 582.9                          | 450.4                  | 395.08845      |
|              |                                | 72.5         | 932.6                          | 697.5                  |                |
|              |                                | 73           | 1175                           | 875                    | 1326.47497     |
|              |                                | 73.5         | 1219                           | 930.5                  |                |
|              |                                | 74           | 1058                           | 869.3                  | 1268.05218     |
|              |                                | 74.5         | 766.5                          | 732.3                  |                |
|              |                                | 75           | 458.6                          | 561.2                  | 359.77983      |
|              |                                | 75.5         | 218.2                          | 393.7                  |                |
|              |                                | 76           | 70.27                          | 259.8                  | 66.70328       |
|              |                                | 76.5         | -2.347                         | 168.8                  |                |
|              |                                | 77           | -27.2                          | 114.3                  | 11.34738       |
|              |                                | 77.5         | -28.78                         | 81.96                  |                |
|              |                                | 78           | -23.9                          | 57.27                  | 1.90184        |
| 78.5         | -20.39                         | 34.84        |                                |                        |                |
| 79           | -19.59                         | 16.14        | 0.31795                        |                        |                |

|  |  |      |        |        |                          |
|--|--|------|--------|--------|--------------------------|
|  |  | 79.5 | -19.78 | 2.785  |                          |
|  |  | 80   | -19.01 | -5.018 | 0.05313                  |
|  |  | 80.5 | -16.86 | -9.563 |                          |
|  |  | 81   | -15.18 | -14.19 | 0.00888                  |
|  |  | 81.5 | -16.06 | -18.86 |                          |
|  |  | 82   | -18.86 | -19.87 | 0.00148                  |
|  |  | 82.5 | -20.8  | -16.69 |                          |
|  |  | 83   | -17.52 | -9.749 | $2.4791 \times 10^{-4}$  |
|  |  | 83.5 | -6.044 | 6.202  |                          |
|  |  | 84   | -29.17 | -60.97 | $4.14253 \times 10^{-5}$ |
|  |  | 84.5 | -28.64 | -65.65 |                          |
|  |  | 85   | 12.77  | 31.48  | $6.9221 \times 10^{-6}$  |

**Table S17.** Heavy-ion fusion cross-section calculations for  $^{46}\text{Ca} + ^{65}\text{Cu}$  (in the octupole vibrational state for the  $^{46}\text{Ca}$ :  $E^* = 3.6140$  MeV;  $\beta_{3-} = 0.2040$  and the quadrupole and hexadecapole rotational (deformed) state of the  $^{65}\text{Cu}$ :  $E^* = 1.4818$  MeV;  $\beta_2 = -0.1250$ ;  $\beta_4 = -0.0050$  framework) reaction.

| Exp.         |                            | Energy [MeV] | $\sigma_{\text{fus}}$ [mb] |                        |                          |                          |                          |
|--------------|----------------------------|--------------|----------------------------|------------------------|--------------------------|--------------------------|--------------------------|
|              |                            |              | No Excitations             | NRV                    | CCFULL                   | CCDEF                    | Wong's Formula           |
| Energy [MeV] | $\sigma_{\text{fus}}$ [mb] | 65           | $9.247 \times 10^{-7}$     | $1.19 \times 10^{-6}$  | $2.60953 \times 10^{-5}$ | $2.72024 \times 10^{-4}$ | $7.93827 \times 10^{-6}$ |
|              |                            | 65.5         | $2.911 \times 10^{-6}$     | $3.818 \times 10^{-6}$ | $7.00649 \times 10^{-5}$ | $6.65173 \times 10^{-4}$ |                          |
|              |                            | 66           | $9.076 \times 10^{-6}$     | $1.208 \times 10^{-5}$ | $1.8768 \times 10^{-4}$  | 0.00163                  | $4.67868 \times 10^{-5}$ |
|              |                            | 66.5         | $2.756 \times 10^{-5}$     | $3.712 \times 10^{-5}$ | $5.05757 \times 10^{-4}$ | 0.00398                  |                          |
|              |                            | 67           | $8.231 \times 10^{-5}$     | $1.118 \times 10^{-4}$ | 0.00138                  | 0.00972                  | $2.75816 \times 10^{-4}$ |
|              |                            | 67.5         | $2.437 \times 10^{-4}$     | $3.334 \times 10^{-4}$ | 0.00381                  | 0.02371                  |                          |
|              |                            | 68           | $7.028 \times 10^{-4}$     | $9.66 \times 10^{-4}$  | 0.01065                  | 0.05762                  | 0.00163                  |
|              |                            | 68.5         | 0.00199                    | 0.00274                | 0.02982                  | 0.1388                   |                          |
|              |                            | 69           | 0.00559                    | 0.00768                | 0.0825                   | 0.32765                  | 0.00959                  |
|              |                            | 69.5         | 0.01531                    | 0.02094                | 0.22057                  | 0.74322                  |                          |
|              |                            | 70           | 0.04117                    | 0.05587                | 0.55818                  | 1.58003                  | 0.05653                  |
|              |                            | 70.5         | 0.11                       | 0.148                  | 1.32211                  | 3.08984                  |                          |
|              |                            | 71           | 0.288                      | 0.381                  | 2.93509                  | 5.53725                  | 0.33186                  |
|              |                            | 71.5         | 0.736                      | 0.957                  | 6.14033                  | 9.17022                  |                          |
|              |                            | 72           | 1.858                      | 2.349                  | 12.09671                 | 14.21882                 | 1.90242                  |
|              |                            | 72.5         | 4.466                      | 5.448                  | 22.14205                 | 20.90695                 |                          |
|              |                            | 73           | 9.971                      | 11.61                  | 36.85969                 | 29.45954                 | 9.66831                  |
|              |                            | 73.5         | 20.03                      | 22.17                  | 55.29799                 | 40.08291                 |                          |
|              |                            | 74           | 34.85                      | 36.99                  | 75.67716                 | 52.88931                 | 33.93025                 |
|              |                            | 74.5         | 53.26                      | 54.68                  | 96.64641                 | 67.78911                 |                          |
|              |                            | 75           | 73.74                      | 73.95                  | 117.66273                | 84.47262                 | 73.48371                 |
|              |                            | 75.5         | 94.97                      | 93.74                  | 138.70121                | 102.52477                |                          |
|              |                            | 76           | 116.4                      | 113.6                  | 159.88516                | 121.546                  | 117.50586                |
|              |                            | 76.5         | 137.7                      | 133.5                  | 181.22721                | 141.19952                |                          |

|  |  |      |       |       |           |           |           |
|--|--|------|-------|-------|-----------|-----------|-----------|
|  |  | 77   | 158.7 | 153.6 | 202.61598 | 161.21388 | 161.48408 |
|  |  | 77.5 | 179.5 | 173.7 | 223.91725 | 181.38191 |           |
|  |  | 78   | 200   | 193.8 | 245.06588 | 201.56457 | 204.52262 |
|  |  | 78.5 | 220.1 | 213.8 | 265.98046 | 221.6866  |           |
|  |  | 79   | 240   | 233.6 | 286.59609 | 241.71834 | 246.50278 |
|  |  | 79.5 | 259.6 | 253.1 | 306.9603  | 261.65305 |           |
|  |  | 80   | 278.9 | 272.3 | 327.07762 | 281.48735 | 287.43859 |
|  |  | 80.5 | 297.8 | 291.2 | 346.81343 | 301.21081 |           |
|  |  | 81   | 316.5 | 309.8 | 366.39261 | 320.807   | 327.36449 |
|  |  | 81.5 | 334.9 | 328.2 | 385.49234 | 340.25929 |           |
|  |  | 82   | 353   | 346.3 | 404.43581 | 359.55404 | 366.31673 |
|  |  | 82.5 | 370.9 | 364.2 | 422.91374 | 378.68125 |           |
|  |  | 83   | 388.4 | 381.8 | 441.29243 | 397.63453 | 404.33038 |
|  |  | 83.5 | 405.7 | 399.1 | 459.03337 | 416.41145 |           |
|  |  | 84   | 422.7 | 416.2 | 476.91751 | 435.01292 | 441.43895 |
|  |  | 84.5 | 439.6 | 433   | 493.86638 | 453.4407  |           |
|  |  | 85   | 456.2 | 449.6 | 511.3725  | 471.69432 | 477.67438 |

**Table S18.** Heavy-ion fusion barrier-distributions calculations for  $^{46}\text{Ca} + ^{65}\text{Cu}$  (in the octupole vibrational state for the  $^{46}\text{Ca}$ :  $E^* = 3.6140$  MeV;  $\beta_{3-} = 0.2040$  and the quadrupole and hexadecapole rotational (deformed) state of the  $^{65}\text{Cu}$ :  $E^* = 1.4818$  MeV;  $\beta_2 = -0.1250$ ;  $\beta_4 = -0.0050$  framework) reaction.

| Exp.         |                                | Energy [MeV] | $d^2(E\sigma)/dE^2$ [mb / MeV] |                        |                |
|--------------|--------------------------------|--------------|--------------------------------|------------------------|----------------|
|              |                                |              | No Excitations                 | NRV                    | Wong's Formula |
| Energy [MeV] | $d^2(E\sigma)/dE^2$ [mb / MeV] | 65           | $1.902 \times 10^{-4}$         | $2.481 \times 10^{-4}$ | 0.00165        |
|              |                                | 65.5         | $7.009 \times 10^{-4}$         | $9.556 \times 10^{-4}$ |                |
|              |                                | 66           | 0.00255                        | 0.00357                | 0.00988        |
|              |                                | 66.5         | 0.00877                        | 0.01199                |                |
|              |                                | 67           | 0.02547                        | 0.03337                | 0.05916        |
|              |                                | 67.5         | 0.0595                         | 0.07911                |                |
|              |                                | 68           | 0.147                          | 0.222                  | 0.35398        |
|              |                                | 68.5         | 0.547                          | 0.832                  |                |
|              |                                | 69           | 2.091                          | 2.728                  | 2.11722        |
|              |                                | 69.5         | 4.706                          | 5.187                  |                |
|              |                                | 70           | 3.861                          | 4.835                  | 12.62815       |
|              |                                | 70.5         | 5.916                          | 16.59                  |                |
|              |                                | 71           | 65.45                          | 100                    | 74.08258       |
|              |                                | 71.5         | 258.6                          | 312.7                  |                |
|              |                                | 72           | 582.9                          | 626.6                  | 395.08845      |
|              |                                | 72.5         | 932.6                          | 933.6                  |                |
|              |                                | 73           | 1175                           | 1117                   | 1326.47497     |
|              |                                | 73.5         | 1219                           | 1106                   |                |

---

|  |  |      |        |        |                          |
|--|--|------|--------|--------|--------------------------|
|  |  | 74   | 1058   | 912.3  | 1268.05218               |
|  |  | 74.5 | 766.5  | 627.2  |                          |
|  |  | 75   | 458.6  | 361.5  | 359.77983                |
|  |  | 75.5 | 218.2  | 183.7  |                          |
|  |  | 76   | 70.27  | 100.5  | 66.70328                 |
|  |  | 76.5 | -2.347 | 75.15  |                          |
|  |  | 77   | -27.2  | 67.7   | 11.34738                 |
|  |  | 77.5 | -28.78 | 57.14  |                          |
|  |  | 78   | -23.9  | 39.13  | 1.90184                  |
|  |  | 78.5 | -20.39 | 18.5   |                          |
|  |  | 79   | -19.59 | 0.657  | 0.31795                  |
|  |  | 79.5 | -19.78 | -11.84 |                          |
|  |  | 80   | -19.01 | -17.7  | 0.05313                  |
|  |  | 80.5 | -16.86 | -17.25 |                          |
|  |  | 81   | -15.18 | -13.51 | 0.00888                  |
|  |  | 81.5 | -16.06 | -11.34 |                          |
|  |  | 82   | -18.86 | -13.58 | 0.00148                  |
|  |  | 82.5 | -20.8  | -18.1  |                          |
|  |  | 83   | -17.52 | -18.98 | $2.4791 \times 10^{-4}$  |
|  |  | 83.5 | -6.044 | -11.83 |                          |
|  |  | 84   | -29.17 | -22.32 | $4.14253 \times 10^{-5}$ |
|  |  | 84.5 | -28.64 | -18.26 |                          |
|  |  | 85   | 12.77  | 8.328  | $6.9221 \times 10^{-6}$  |

---
